|                                                                                                            |    |
|------------------------------------------------------------------------------------------------------------|----|
| <b>Cytokinin regulates energy utilization in <i>Botrytis cinerea</i></b>                                   | 1  |
|                                                                                                            | 2  |
| Gautam Anand, Rupali Gupta, and Maya Bar*                                                                  | 3  |
|                                                                                                            | 4  |
| Department of Plant Pathology and Weed Research, ARO, Volcani Institute, Rishon LeZion<br>7505101, Israel. | 5  |
|                                                                                                            | 6  |
|                                                                                                            | 7  |
| *Corresponding author: Maya Bar                                                                            | 8  |
| mayabar@volcani.agri.gov.il                                                                                | 9  |
| ORCID: 0000-0002-7823-9121                                                                                 | 10 |
|                                                                                                            | 11 |
| Short title: Cytokinin and <i>Botrytis</i> energy status                                                   | 12 |
|                                                                                                            | 13 |
| Keywords: <i>Botrytis cinerea</i> , Cytokinin, Pathogenesis, Nutrition, Glycolysis, Redox                  | 14 |

## Abstract

The plant hormone cytokinin (CK) is an important developmental regulator, promoting morphogenesis and delaying senescence. Previous work by us and others has demonstrated that CKs also mediate plant immunity and disease resistance. Some phytopathogens have been reported to secrete CKs, and may manipulate CK signaling to regulate the host cell cycle and nutrient allocation, to improve their pathogenic abilities. In a recent work, we demonstrated that CK directly inhibits the growth, development, and virulence of fungal phytopathogens, by down regulating the cell cycle and reducing cytoskeleton organization and cellular trafficking in the fungus. Here, focusing on *Botrytis cinerea* (*Bc*), we report that the effect of CK on *Bc* is tied to nutrient availability; CK strongly inhibits *Bc* growth and de-regulated cytoskeleton organization in a nutrient rich environment, but has a diminished effect when nutrients are scarce. Using biochemical assays and transgenic redox sensitive botrytis lines, we examined the effect of CK on energy consumption in the fungus, and demonstrate that CK promotes glycolysis and energy consumption in *Bc*, both *in vitro* and *in planta*. Here, glycolysis and increased oxidation were stronger with waning nutrient availability. Transcriptomic data further supports our findings, demonstrating significant upregulation to glycolysis, oxidative phosphorylation, and sucrose metabolism, upon CK treatment. The metabolic effects of CK on the fungus likely reflect the role of plant CK during early infection by necrotrophic pathogens, which are known to have an initial, short biotrophic phase. In addition to the plant producing CK during its interaction with the pathogen for defense priming and pathogen inhibition, the pathogen may take advantage of this increased CK to boost its metabolism and energy production, in preparation for the necrotrophic phase of the infection. Thus, the role of CK in controlling senescence can be exploited by diverse phytopathogens to their advantage.

## Author summary

39

Cytokinin (CK) is one of the primary plant developmental hormones, regulating many developmental processes. Several works have highlighted the involvement of CK in plant defense. We recently reported that CK can directly inhibit fungal plant pathogens. CK inhibits *Botrytis cinerea* growth by arresting the cell cycle and de-regulating cytoskeleton organization and cellular trafficking. Here, we report that CK positively regulates *B. cinerea* energy consumption, causing an increase in glycolytic rates and energy consumption. The effect of CK on *B. cinerea* was dependent on nutrient availability, with CK causing stronger increases in glycolysis and lower growth inhibition when nutrient availability was low, and weaker glycolytic increases coupled with stronger growth inhibition in a high nutrient environment. We propose that CK can be viewed as a bidirectional signaling molecule in plant pathogen interactions: CK acts as a signal to the fungus that plant tissue is present, causing it to activate sugar and energy metabolism pathways to take advantage of the available food source, while at the same time, CK is employed by the plant to inhibit the attacking pathogen.

40

41

42

43

44

45

46

47

48

49

50

51

52

## Introduction 53

Plant cytokinins (CKs) are known to be important in many aspects of plant life, 54  
including development of vasculature, differentiation of embryonic cells, seed development, 55  
maintenance of meristematic cells, growth and branching of root, shoot formation, 56  
chloroplast biogenesis, and leaf senescence [1,2]. CKs also play an important role in nutrient 57  
balance and stress responses in the plant [3,4]. They are known to influence macronutrient 58  
balance by regulating the expression of nitrate, phosphate and sulphate transporters [5–8]. 59  
In addition, roles for CKs in fungal pathogenesis have also been suggested, either in the 60  
context of the pathogens producing CKs, or in the context of the pathogen activating the CK 61  
pathway in the host plant [9–12]. Jameson, [13] suggested that to achieve pathogenesis in 62  
the host, CK-secreting fungal biotrophs or hemibiotrophs alter CK signalling to regulate the 63  
host cell cycle and nutrient allocation. For instance, germinating uredospores of *Puccinia spp.* 64  
have been shown to accumulate CK, modifying CK signalling to maintain plant cell cycle 65  
[14,15]. Plant CK levels can be modulated by the application of exogenous CKs, and several 66  
studies have found a positive effect of CK treatment in reduction of diseases caused by smut 67  
fungi, powdery mildew, and viruses [10,16–18]. More recently, CK was also found to enhance 68  
disease resistance to additional, non obligatory plant pathogens. Elevated levels of CKs were 69  
shown to increase host resistance to various pathogens in a wide range of plants [4,12,19– 70  
21]. We recently reported that endogenous and exogenous applications of CKs induces 71  
systemic immunity in tomato, enhancing resistance against fungal pathogen *Botrytis cinerea* 72  
(*Bc*) by salicylic acid and ethylene signalling [4]. 73

*Bc*, the causative agent of grey mould disease, is a cosmopolitan pathogen that can 74  
infect more than 1400 host plants, and causes massive losses worldwide annually [22]. *Bc* is 75  
a mostly [23,24] necrotrophic pathogen which has been widely used as a model pathogen to 76

study various mechanism underlying plant-pathogen interactions. Due to its economic 77  
importance, *Bc* is listed in top 10 important plant fungal pathogens [25]. During pathogenesis, 78  
*Bc* induces necrosis in the host by producing various toxins such as botrydial, botcinic acid, 79  
and its derivatives [26,27] and production of reactive oxygen species (ROS), and also 80  
manipulates the host plant into generating oxidative bursts that facilitate colonization [28,29] 81  
and promote extension of macerated lesions by the induction of apoptotic cell death. Various 82  
enzymes including lytic enzymes, which are sequentially secreted by the fungus, facilitate 83  
penetration, colonization, and produce an important source of nutrients for the fungus [30]. 84

*Bc* spores are primary sources of infection to plants in nature. After contacting the 85  
plant surface, the spores germinate to form short germ tubes that directly penetrate plant 86  
tissues [31]. It is known since long that germination of spores and infection through plant 87  
surfaces relies on their ability to access the nutrient supply offered by living plants [32,33]. 88  
Solomon and co-workers [34] have suggested a model that describes nutrient availability to 89  
the fungi during different phases of fungal infection to plant host. The first phase, which 90  
involves spore germination and host penetration, is based on lipolysis. The second phase, 91  
which requires invasion of plant tissues, uses glycolysis. Studies on *Tapesia yellundae*, 92  
*Colletotrichum lagenarium* and *Cladosporium fulvum* suggest that lipids are the main sources 93  
of energy during germination and penetration and after penetration the available plant sugars 94  
become the main source of energy [35–37]. These different stages of fungal infection and 95  
metabolism depend on nutrient availability and allocation. Role of CK in nutrient balance in 96  
plant is well studied but its role in nutrient balance and metabolism in necrotrophic fungus 97  
like *Bc* needs to be investigated. 98

Recently, we have found that CK inhibits the growth of a variety of plant pathogenic fungi. In depth characterization of the phenomenon in botrytis revealed that CK in plant physiological concentrations can inhibit sporulation, spore germination, and virulence [38] of *Bc*. We also found CK to affect both budding and fission yeast. Transcriptome profiling of *Bc* grown with CK revealed that DNA replication and the cell cycle, cytoskeleton integrity, and endocytosis, are all repressed by CK [38].

Given that CK had such fundamental, conserved, and ubiquitous effects on fungal development, the question of a possible role for CK in affecting fungal metabolism and nutrition, in particular during host-pathogen interactions, arises. In this study, we investigated the effect of CK on fungal metabolism. Using *Bc*, we examined how CK affects fungal metabolism and nutrition, both in the context of fungal growth and during infection in the tomato host. We found that CK promoted fungal metabolism, with inverse correlation to nutrient and sugar availability, and that the redox state of *Bc* was affected by CK both during growth and during infection in the plant host. Our results reveal additional roles for CK in fungus-plant interactions, and may shed light on the availability of energy and nutrients to the fungus during initial stages of plant infection.

99

100

101

102

103

104

105

106

107

108

109

110

111

112

113

114

115

116

## **Results** 117

### **CK mediated *Bc* growth inhibition and cytoskeleton de-regulation depend on nutrient** 118

#### **availability** 119

In order to examine if direct effect of CK on *Bc* is affected by nutrient availability, we grew *Bc* 120  
on different strengths of PDA media, with and without CK. The inhibition of mycelial growth 121  
by CK was found to depend on the media strength, and was strongest in rich media, slowly 122  
declining with decrease in nutrient availability (Fig. 1). CK-mediated growth inhibition was no 123  
longer significant in 1/8 media (Fig. 1). Similar results were obtained with growth in liquid 124  
media (S1 Fig.). Growth inhibition of *Bc* by CK in rich media was previously reported by our 125  
group [38]. 126

To examine cytoskeleton integrity, we transformed *B. cinerea* with lifeact-GFP [40], and 128  
proceeded to treat the transformed fungal cells with CK in full and ¼ PDB (Fig. 2). As reported 129  
previously by our group [38], we observed mis-localization of actin, which is normally localized 130  
to growing hyphal tips [52,53], upon CK treatment in full PDB. However, there was less effect 131  
of CK on F-actin distribution when cells were grown in ¼ media (Fig. 2). Tip-specific localization 132  
of F-actin was less affected by CK in ¼ media (Fig. 2). Analysis of corrected total fluorescence 133  
in Mock and CK treated cells grown in full and ¼ PDB demonstrated that the ratio between 134  
actin in the tip of the cell, and the total cell, decreased greatly in the presence of CK in full 135  
PDB but far less in ¼ PDB (Fig. 2). An important observation was reduced actin polarization in 136  
mock samples of quarter media which might relate to reduced growth in low strength media. 137

### **Transcriptome profiling reveals an effect of CK on *Bc* metabolic pathways and sugar** 139

#### **transport** 140

We previously conducted transcriptome profiling on *Bc* treated with CK, finding down 141  
regulation upon CK treatment of a variety of growth and developmental pathways in *Bc*, 142  
including inhibition of cell division, DNA replication, endocytosis and the actin cytoskeleton 143  
[38]. Given that we found the effect of CK to depend on the nutritional context (Fig. 1), we 144  
next mined our transcriptomic data for alterations in gene expression that might explain this 145  
phenomenon. Interestingly, we found that the glycolysis, sucrose metabolism, and oxidative 146  
phosphorylation KEGG pathways were significantly upregulated in *Bc* upon CK treatment 147  
([38]; Fig. 3, S1 Data). Over a quarter of the pathway genes were upregulated in the glycolysis 148  
(Figure 3A) and oxidative phosphorylation (Fig. 3C) pathways, with an FDR corrected  $p$ - 149  
 $val < 0.0071$  for glycolysis, and  $p$ - $val < 2.94 \times 10^{-11}$  for oxidative phosphorylation. A third of the 150  
sucrose/starch metabolism pathway was upregulated, FDR corrected  $p$ - $val < 0.0035$  (Fig. 3D, 151  
S1 Data). Interestingly, though we found virulence genes as a group to be downregulated 152  
upon CK treatment [38], sugar-metabolism genes known to have a role in virulence such as 153  
pectin methyl esterase and poly-endogalacturonase [54], were upregulated upon CK 154  
treatment, despite the overall downregulation of virulence (Fig. 3D, S1 Data). Sugar 155  
transporters are known to be upregulated in *Bc* during pathogenesis [55,56]. In addition to 156  
glycolysis, sucrose metabolism, and oxidative phosphorylation, we found a significant 157  
upregulation of sugar transporter expression following CK treatment ([38]; S1 Data). 158  
For glycolysis pathway genes, we also conducted a RT-qPCR validation of the upregulation of 159  
some of the key pathway genes found to be upregulated in the transcriptome following CK 160  
treatment. Fig. 3B depicts a comparison between the fold change of these genes in the 161  
transcriptome, and the changes we observed in an independent experiment in qPCR. 162

163



**CK rescues inhibition of glycolysis and ATP synthesis in a nutrient availability dependent** 164

**manner** 165

To examine the effect of CK on *Bc* metabolism, we used 2-Deoxy-D-glucose (2-DG) and 166  
oligomycin (OM), which are inhibitors of glycolysis and ATP synthesis, respectively. 2-DG is a 167  
glucose analog that inhibits glycolysis by competing with glucose as a substrate for 168  
hexokinase, the rate-limiting enzyme in glycolysis. After entering the cell, 2-DG is 169  
phosphorylated by hexokinase II to 2-deoxy-d-glucose-6-phosphate (2-DG-6-P) but, unlike 170  
glucose, 2-DG-6-P cannot be further metabolized by phosphoglucose isomerase. This leads to 171  
the accumulation of 2-DG-6-P in the cell, and subsequent depletion in cellular ATP [57]. OM 172  
inhibits mitochondrial H<sup>+</sup>-ATP-synthase, and has been attributed antifungal properties 173  
[58,59]. *Bc* was grown with these two inhibitors separately at different media strength, as 174  
described above. 2-DG significantly inhibited growth at low media strength, in the 175  
concentration used (Fig. 4). OM was inhibitory at all media strengths in the concentration 176  
used (Fig. 4). CK (100 μM) was found to rescue the inhibitory effect of 2-DG when added to 177  
the growth media. Lowering the nutrient availability promoted CK-mediated rescue of 178  
glycolysis inhibition by 2-DG. Interestingly, following OM treatment, the fungi became 179  
insensitive to CK and were not further inhibited by the addition of CK. A partial rescue of ATP 180  
synthesis mediated inhibition of growth by CK was observed in full and 1/2 media. These 181  
results strengthen the notion that CK is affecting glycolysis in the fungus, and is in the same 182  
pathway as ATP synthesis. 183

**CK induces glucose uptake in *Bc*** 184 185

The dependence of CK-mediated growth inhibition on nutrition and energy state, and the 186  
rescue of glycolysis inhibition by CK, indicated that CK is affecting *Bc* metabolism. To further 187

confirm this hypothesis, we next measured glucose uptake in the presence of CK in both rich 188  
PDB and synthetic defined liquid media. We observed a significant increase of glucose uptake 189  
in the presence of CK in both media types (Fig. 5). Interestingly, the percent increase of 190  
glucose uptake by *Bc* in the presence of CK increased with decreasing nutrient availability in 191  
the media (Fig. 5). There was significant increase of sugar uptake in defined media but it was 192  
not dependent on media strength. We know 2-DG competes with glucose in the glycolytic 193  
pathway. The increase of sugar uptake might be the reason why CK rescues glycolysis 194  
inhibition by 2-DG. Since ATP is required for growth, it is not surprising that inhibition of ATP 195  
synthesis prevented further growth inhibition by CK. 196

#### **CK alters *Bc* redox status**

 197

Since metabolic pathway fluctuations can affect redox status [60], and redox homeostasis in 198  
*Bc* is known to change during host infection [61,62], we next examined cytosolic and 199  
mitochondrial redox status in the fungus grown with CK. For this purpose, we generated *Bcl*- 200  
16 strain lines expressing GRX-roGFP and mito-roGFP, using previously described expression 201  
cassettes that were used for the measurement of *Bc* redox status [40,51]. We found that after 202  
24 hours of growth, CK significantly altered the cytosolic redox of *Bc* to a more reduced state, 203  
while the mitochondrial redox was significantly more oxidised with CK (Fig. 6A). Following 204  
redox over time, we observed similar states in the first 8 hours of growth, with CK starting to 205  
affect the redox state after about 15 hours of co-cultivation, corresponding with the stage at 206  
which mycelia are elongating (Fig. 6B-C). Cytosolic and mitochondrial redox states are often 207  
inversely correlated [50]. Interestingly, there was an inverse effect of CK on cytosolic and 208  
mitochondrial redox of growing mycelia (Fig. 6). 209  
210

211

## **Endogenous CK content of tomato leaves affects redox state of *Bc* during plant infection** 212

Since CK affected redox in *Bc* in rich media, we next examined whether endogenous CK 213  
content in tomato leaves can affect the redox status of infecting *Bc* mycelia. For this, *Bc* GRX- 214  
roGFP and mito-roGFP conidia from freshly sporulated PDA plates were used to infect 215  
detached leaves from M82, IPT, and CKX plants. Leaves overexpressing IPT have increased CK 216  
content and are more resistant to *Bc* infection, while leaves overexpressing CKX have reduced 217  
CK content and are more sensitive to *Bc* infection [4]. Redox-dependent changes in GRX- 218  
roGFP2 and mito-roGFP fluorescence in living *Botrytis* hyphae have been previously visualized 219  
by confocal laser scanning microscopy (CLSM) [50]. Infecting *Bc* hyphae expressing GRX-roGFP 220  
in the cytosol or mito-roGFP in the intermembrane mitochondrial space were analysed 221  
microscopically, 24 and 48 hours after inoculation. Similar to the fluorometry-based 222  
calculations, a higher 405nm/488nm ratio indicates more oxidised state, and a lower ratio, a 223  
more reduced state. We found that 24 hours after inoculation, the cytosolic redox state of 224  
the infecting hyphae was more oxidised on IPT leaves (high CK content) as compared to the 225  
infecting hyphae on mock M82 leaves, while infecting hyphae on CKX (low CK content) were 226  
more reduced (Fig. 7A,C). In a parallel set of experiments which included additional 227  
genotypes, we also observed increased oxidation of the *Bc* cytosol when infecting M82 leaves 228  
that were pre-treated with CK, or when infecting leaves of the hypersensitive *clausa* mutant 229  
(S2 Fig.). 48 hours post inoculation, we observed an opposite trend of the cytosolic redox of 230  
the infecting hyphae, with hyphae on IPT becoming more reduced while hyphae on CKX were 231  
more oxidised, when compared with M82 leaves. (Fig. 7A,C). Here, again, in a parallel set of 232  
experiments, which included additional genotypes, we also observed increased reduction of 233  
the *Bc* cytosol when infecting leaves of the hypersensitive *clausa* mutant (S2 Fig.). When 234  
examining mitochondrial redox of the hyphae growing on IPT or CKX leaves, we found that, 235

48 post inoculation, mitochondrial redox of the hyphae growing on IPT was significantly 236  
oxidised as compared to mock M82, while hyphae growing on CKX were significantly reduced 237  
(Fig. 7B,C). The cytosolic redox was measured in a parallel set of experiments on leaf discs 238  
co-cultivated with *Bc* spores in a fluorimeter plate, with similar results (S3 Fig.). To verify that 239  
the virulence of the roGFP fungi was intact, we also conducted disease assays of these fungi 240  
on the different genotypes, with findings consistent with previous results [4], i.e., reduced 241  
disease on high-CK or CK-hypersensitive genotypes, and increased disease on low-CK 242  
genotypes (S4 Fig.). 243

We further examined the transcriptome of *Bc* grown in the presence of tobacco seedlings 244  
following CK treatment, finding significant changes, both significant downregulation and 245  
significant upregulation, in NADPH/NADH reductases and oxidoreductases (S5 Fig.). These 246  
transcriptional changes in the fungus further support the notion that CK is affecting ROS 247  
coping mechanisms in *Bc*, and could underlie the altered pathogenesis courses observed in 248  
tomato genotypes with altered CK content. 249

## Discussion

250

It has been previously reported by us and others that CK promotes fungal disease 251  
resistance in plants [4,12]. Recently, we reported a direct inhibitory effect of CK on *Bc* growth 252  
and development *in vitro* [38]. Our previous results indicated that *B. cinerea* responds to CK 253  
and activates signaling cascades in its presence, leading to inhibition of the cell cycle, mis- 254  
localization of the actin cytoskeleton, and inhibition of cellular trafficking [38]. Our previous 255  
RNAseq data provided several clues as to which pathways in the fungus are affected by CK. 256  
Given those results, in addition to previous observations concerning the cell cycle and 257  
cytoskeleton of the fungus in the presence of CK, we hypothesized that CK may be exerting 258  
its effect through influence on fungal metabolic pathways. The present study was performed 259  
to examine the effect of CK on *Bc* metabolism. We examined sugar uptake, glycolysis, and 260  
cellular redox status of *Bc* in the presence of CK. Our results demonstrate that the inhibitory 261  
activity of CK against *Bc* is largely dependent on the status of nutrient and energy availability. 262  
We found that the inhibitory effect of CK on *Bc* was correlated with nutrient and energy 263  
availability, with fungi grown in rich media being inhibited more strongly than fungi grown in 264  
sub-optimal conditions (Fig. 1, S1 Fig.). Intact F-actin was found to be required for hyphal 265  
growth, morphogenesis, and virulence, which were all impaired in F-actin capping protein 266  
deletion mutants [63]. Since we had previously observed that CK caused mis-localization of 267  
actin at the growing tip of *Bc* hyphae [38], we examined whether this phenomenon was also 268  
correlated with the nutritional status of the environment. Indeed, we found that the effect of 269  
CK on the cytoskeleton is also dependent on the status of nutrient availability (Fig. 2). 270  
Interestingly, we observed reduced polarization of F-actin in *Bc* growing in minimal media 271  
when compared with rich media (Fig. 2), providing one underlying mechanism for reduced 272  
fungal growth under low nutrient conditions. 273

Our previously published transcriptome profile revealed that important developmental pathways such as cell division, cellular trafficking, and the cytoskeleton, were inhibited upon CK treatment. Our results demonstrated that the effect of CK on *Bc* is dependent on nutritional status. Re-examining our transcriptomic data in light of this, we found that glycolysis, sucrose metabolism and oxidative phosphorylation pathways were significantly enriched upon CK treatment (Fig. 3). The expression of sugar transporters was also significantly upregulated in the RNAseq data.

This transcriptomic data was generated under defined nutrient conditions. To further examine possible effects of CK on fungal metabolism, we investigated the effect of CK on glycolysis and ATP synthesis, under different nutrient and energy availability. We found that CK was able to rescue inhibition of glycolysis and ATP synthesis in a nutrient dependent manner, with stronger rescue observed under minimal nutrient conditions. CK also promoted an increase in sugar uptake by the fungus, in a nutrient dependent manner, with the strongest uptake promotion observed under minimal nutrient and energy conditions (Figs. 4-5). Upregulation of glycolysis and oxidative phosphorylation key genes, together with the increased uptake of sugar, could explain the rescue of metabolic inhibition by CK. Taken together, these results confirm that the effect of CK on *Bc* is dependent on nutrient availability.

Changes in metabolic pathways are often reflected in the redox status [62]. Hence, we examined the effect of CK on *Bc* redox status both *in vitro* and *in planta*, using tomato genotypes with varying CK content or sensitivity. *Bc* cells grown with CK in rich media had a significantly reduced cytosol and a significantly oxidized mitochondria (Fig. 6). A reduced cytosol and oxidized mitochondria is indicative of increased glycolysis and oxidative phosphorylation [64,65]. Thus, this result correlated with our transcriptomic data, in which

glycolysis and oxidative phosphorylation are upregulated in the presence of CK (Fig. 3), and 298  
also with our results demonstrating that CK promotes sugar uptake in *Bc* (Fig. 5). *In planta*, 299  
after 48h of inoculation, *Bc* had a reduced cytosol and oxidized mitochondria when infecting 300  
the CK-rich IPT, and an oxidized cytosol and reduced mitochondria when infecting the CK- 301  
deficient CKX, confirming that CK can affect the redox state of *Bc* during infection *in planta*. 302  
This significant change in redox was also coupled with the lower virulence on IPT leaves and 303  
higher virulence on CKX leaves (S4 Fig., [4]). It was previously reported that the cytosol of 304  
infecting *Bc* hyphae on dead onion peel is reduced [50]. Our results also show that *Bc* cytosol 305  
is more reduced in IPT, but the resultant infection was lower when compared to that on CKX. 306  
In addition to the different hosts systems and different infection time frames, a possible 307  
explanation for this could be the CK-mediated immunity induced in the host [4,12]. The results 308  
of redox state of *Bc* hyphae in vitro and in planta, together with transcriptome data and sugar 309  
uptake results, might relate to the role of CK in nutrient allocation in fungi during infection. 310

CKs have previously described roles in plant–pathogen interactions [3,4]. The 311  
interaction of some biotrophic pathogens with their hosts leads to the formation of green 312  
bionissia (formerly known as green islands) [66], which are sites of green living tissue 313  
surrounding the sites of active pathogen growth [9]. The formation of these green bionissia is 314  
correlated with elevated levels of cytokinins in these tissues. It is believed that cytokinins 315  
likely delay the onset of senescence in green bionissia, allowing pathogens access to more 316  
nutrients from the plant [9]. Necrotrophic fungal pathogens, which obtain their nutrients 317  
from dead plant cells, have also been reported to cause the formation of green tissue around 318  
the sites of infection (green necronissia) in certain cases [9]. Application of exogenous CK is 319  
known to induce the formation green necronissia [9,15,67]. We found that the effect of CK 320  
on *Bc* is dependent on nutrient availability, and can induce glycolysis, oxidative 321

phosphorylation and sugar uptake. We also observed CK-mediated redox shifts in *Bc*, that are 322  
likely due to these increases in metabolism. 323

We previously observed that CK inhibits *Bc* growth and development in vitro, in plant- 324  
physiological concentrations. The metabolic effects of CK on the fungus likely reflect the role 325  
of plant CK during early infection by necrotrophic pathogens, which have been demonstrated 326  
they have a short biotrophic phase [23,68]. Necrotrophic pathogens secrete toxins and 327  
enzymes to cause cellular damage. Thus, in addition to the plant producing CK during its 328  
interaction with the pathogen for the purpose of priming its defenses and inhibiting pathogen 329  
growth, the pathogen may take advantage of this increase in CK to exploit the formation of 330  
green necronissia, by increasing its metabolism and energy production, to prepare for the 331  
necrotrophic phase of the infection. Thus, the role of CK in controlling senescence, which is 332  
used by biotrophic pathogens to their advantage, likely also benefits necrotrophs during their 333  
biotrophic phase. However, when CK content is high as in IPT, the CK is also directly inhibitory 334  
against the pathogen, causing an attenuation of virulence, rendering the advantage of the CK 335  
to the pathogen in this initial phase of the infection irrelevant. 336

Our work suggests that CK may serve as central player in the hormonal cross-talk 337  
between plant host and phytopathogen, and that the role of CK in controlling senescence can 338  
be exploited by diverse fungal phytopathogens to their advantage. Future research will focus 339  
on the role of CK in nutrient allocation in fungal phytopathogens during infection, affording 340  
insights into fungal infection phases in the context of host-phytopathogen interactions. 341

342



## **Materials and Methods** 343

### **Fungal growth conditions** 344

*B. cinerea* strain Bcl16 (*B. cinerea*, *Bc* was grown on potato dextrose agar (PDA) at  $22 \pm 2$  °C 345

for 5 days. Bcl-16 sporulates well on different types of media including PDA [38]. 346

347

### **Mycelial growth assay** 348

To study how nutrient availability affects mycelial growth of *Bc* in the presence of CK, 6-BAP 349

(6-Benzylaminopurine, Sigma-Aldrich) was dissolved in 10mM NaOH and added to PDA media 350

of full, half, one-fourth and one-eighth strength. To study how *Bc* responds to metabolic 351

inhibitors in the presence of CK, 2-Deoxy-D-glucose (2-DG) and oligomycin (OM) were added 352

to PDA media at above mentioned strength to final concentration 100  $\mu$ M, 2.5 mM and 0.1 353

$\mu$ g/mL respectively. *Bc* mycelial plugs (5 mm) taken ~1cm from the edge of a fresh plate were 354

placed at the centre of PDA plates and incubated under the above mentioned growth 355

conditions. To measure the mycelium weight in liquid media, *Bc* was cultured in stationary 356

liquid PDB full and one-fourth media strength in the presence of 100  $\mu$ M concentrations of 6- 357

BAP. After 72 h, the fungal mass was dried and the dry weight was measured. 358

359

### **Effect of CK on glucose uptake at different media strength** 360

To evaluate the effect of CK on glucose uptake, spores were harvested in 1 mg mL<sup>-1</sup> glucose 361

and 1 mg mL<sup>-1</sup> K<sub>2</sub>HPO<sub>4</sub> and filtered through 40  $\mu$ m pore cell strainer. Spore concentration was 362

adjusted to 10<sup>6</sup> spores mL<sup>-1</sup> using a Neubauer chamber. *Bc* spores were grown in potato 363

dextrose broth (PDB) or defined media of full, half and one-fourth strength. Composition of 364

defined media was glucose (20 g/L) and 4 g/L each of K<sub>2</sub>HPO<sub>4</sub>, KH<sub>2</sub>PO<sub>4</sub>, and NH<sub>4</sub>SO<sub>4</sub>. 100  $\mu$ M 365

of CK were added to both PDB and defined media cultures, which were then allowed to grow 366

for 48 hours. The amount of metabolized glucose was analysed by measuring the amount of  
glucose present in the media by standard DNSA method [39] using dextrose as standard.  
Metabolized glucose was assumed to be inversely proportional to the amount present in the  
media. For control, glucose in different strength of media subjected to above mentioned  
conditions but without *Bc* was measured.

### **Generation of *B. cinerea* lines expressing lifeact-GFP**

For generation of *Bc* strains expressing Lifeact-GFP, we used a fusion construct to target  
replacement of nitrate reductase (*bcniaD*) gene in manner reported previously by our group  
and others [38,40]. The plasmid pNDH-OLGG, which is used as a template for the amplification  
of expression cassette, has flanking sequences of *bcniaD*, a resistance cassette for  
hygromycin, and the filamentous actin (F-actin) imaging probe "Lifeact" fused to GFP. Primers  
GA 34F/34R (S1 Table) from our previous study [38] were used for the amplification of the  
expression cassette. PEG-mediated transformation was used to transfer the PCR amplified  
expression cassette to *Bc* [41]. Fungal transformants were visualized under a confocal  
microscope and screened with primers GA 44F/44R and GA 31F/31R (S1 Table). To examine  
the effect of CK on cytoskeleton in different nutrient availability, spores of transformed *Bc*  
were treated with Mock or CK (100uM) in full and ¼ PDB and grown for 6h and 24h hours  
respectively, prior to confocal visualization in full and one forth PDB broth media,  
respectively. We acquired confocal microscopy images using a Olympus IX 81 inverted laser  
scanning confocal microscope (Fluoview 500) equipped with an OBIS 488 nm laser lines and  
a 60× 1.0 NA PlanApo water immersion objective. GFP images of 24 bits and 1024 × 1024  
pixels were imaged using the excitation/emission filters: BP460-480GFP/BA495-540GFP.

Image analysis was conducted with Fiji-ImageJ using the raw images and the 3D object counter tool and measurement analysis tool [42].

### **Transcriptome analysis of metabolic pathway genes**

Procedures for RNA preparation, quality control, sequencing, and transcriptome analysis are detailed in our previous work [38]. Differential expression analysis was executed using the DESeq2 R package [43]. Genes with an adjusted *p*-value of no more than 0.05 were considered differentially expressed. PCA was calculated using the R function `prcomp`. The sequencing data generated in this project was previously published [38], and the raw data is available at NCBI under bioproject accession number PRJNA718329.

The gene sequences were used as a query term for a search of the NCBI non-redundant (nr) protein database that was carried out with the DIAMOND program [44]. The search results were imported into Blast2GO version 4.0 [45] for gene ontology (GO) assignments. Gene ontology enrichment analysis was carried out using Blast2GO program based on Fisher's Exact Test with multiple testing correction of false discovery rate (FDR). KOBAS 3.0 tool (<http://kobas.cbi.pku.edu.cn/kobas3/?t=1>) [46] was used to detect the statistical enrichment of differential expression genes in KEGG pathway and Gene Ontology (GO).

### **Effect of CK on the expression of glycolysis genes**

To examine the effect of cytokinin on fungal glycolysis and validate the RNAseq results, we grew *Bc* spores in PDB with 0 and 100  $\mu$ M 6-BAP in a rotary shaker at 180 rpm and  $22 \pm 2$  °C for 24 hours. Total RNA was isolated using Tri reagent (Sigma-Aldrich) according to the manufacturer's instructions. RNA (3 $\mu$ g) was used to prepare cDNA using reverse transcriptase (Promega, United States) and oligodT15. qRT-PCR was performed on a Step One Plus Real-

Time PCR system (Thermo Fisher, Waltham, MA, United States) with Power SYBR Green 414  
Master Mix protocol (Life Technologies, Thermo Fisher, United States). For glycolysis analysis, 415  
we selected the following genes: Glyceraldehyde-3-phosphate dehydrogenase 416  
(XP\_024553281.1), pyruvate dehydrogenase (XP\_001558781.1), aldehyde dehydrogenase 417  
(XP\_001554714.1), and alcohol dehydrogenase (XP\_001554746.1). The primer sequences for 418  
each gene, and primer pair efficiencies, are detailed in S2 Table. A geometric mean of the 419  
expression values of the three housekeeping genes: ubiquitin-conjugating enzyme E2 (ubce) 420  
[47], Iron-transport multicopper oxidase, and Adenosine deaminase [48] was used for 421  
normalization of gene expression levels. All primer efficiencies were in the range 0.97-1.03 422  
(S2 Table). Relative expression was calculated using the copy number method [49]. At least 423  
six independent biological replicates were used for analysis. 424

### **Generation of redox sensitive *Bc***

 425 426

For the detection of redox state in cytosol and mitochondria, *B. cinerea* expressing GRX-roGFP 427  
and mito-roGFP were generated. For the expression of the redox sensors, the construct 428  
generated previously was used [40,50,51]. For generation of constructs expressing GRX-roGFP 429  
at the *bcniaA* locus, we used the plasmid pNAH-GRX-roGFP as template. The vector contains 430  
5' and 3' flanking sequences of *bcniaA*, a resistance cassette mediating resistance to 431  
hygromycin, and sensor for the redox potential of the cellular glutathione pool glutaredoxin 432  
probe "GRX" fused to GFP. The expression cassette carrying the hygromycin resistance gene, 433  
GRX-roGFP and the *bcniaA* flanking sequence was amplified using primers GA 41F/41R (S1 434  
Table). The PCR amplified expression cassette was used to transform *B. cinerea* using PEG 435  
mediated transformation. 0.125% lysing enzyme from *Trichoderma harzianum* (Sigma– 436  
Aldrich, Germany) was used for protoplast generation. Following PEG mediated 437

transformation, protoplasts were plated on SH medium containing sucrose, Tris-Cl, 438  
(NH<sub>4</sub>)<sub>2</sub>HPO<sub>4</sub> and 35µg/mL hygromycin B (Sigma–Aldrich, Germany). Colonies that grew after 2 439  
days of incubation were transferred to PDA-hygromycin medium, and conidia were spread 440  
again on selection plates to obtain a monoconidial culture. Fungal transformants were 441  
visualized under a confocal microscope and screened with primers GA 42R/42R (S1 Table). 442  
Confirmed transformants were stored at -80°C and used for further experiments. 443

### **Measurement of *Bc* redox status in liquid media**

 444

Redox state of roGFP transformed *Bc* was measured in liquid culture using a fluorimeter. *Bc* 446  
strains expressing GRX-roGFP and mito-roGFP were grown for 2 weeks on PDA medium at 447  
18°C in the light to induce mass sporulation. 10 mL of PDB medium containing 100 µM CK was 448  
inoculated with conidia and incubated for 24 h at 18 °C on 150 rounds per minute (rpm). 1mL 449  
samples were taken and washed twice in double distilled water. A 96-well plate (Microplate 450  
pureGrade™ 96-well PS, transparent bottom) was inoculated with 200 µL of the washed 451  
germlings and used for fluorescence measurements using a fluorimeter (Promega GloMax® 452  
explorer multimode microplate reader, GM3500, USA). Fluorescence was measured at the 453  
bottom with 3 × 3 reads per well and an excitation wavelength of 405 ± 5 nm for the oxidized 454  
state and 488 ± 5 nm for the reduced state of roGFP2. The emission was detected at 510 ± 5 455  
nm [50]. The gain was set to 100. Relative fluorescence units (RFU) were recorded to calculate 456  
the Em405/Em488 ratio. 457

### **Imaging of *Bc* redox state during on-plant pathogenesis**

 458

To examine the effect of endogenous CK content on the redox state of *Bc* during 460  
pathogenesis, *Bc* GRX-roGFP conidia from freshly sporulated PDA plates were used to infect 461

detached leaves from the *S. lycopersicum* M82 background line, as well as M82 462  
overexpressing the Arabidopsis isopentenyl transferase (IPT) gene *AtIPT7* under the FIL 463  
promoter: *pFIL>>IPT7* (IPT), and M82 overexpressing the Arabidopsis cytokinin oxidase (CKX) 464  
gene *AtIPT3* under the BLS promoter: *pBLS>>CKX3* (CKX) [4]. For *Bc* inoculation, *Bc* was grown 465  
on PDA in the dark at  $22\pm 2^{\circ}\text{C}$ . Ten days old plates were given daylight for 6 h, and then 466  
returned to the dark for sporulation. Spores were harvested in  $1\text{ mg mL}^{-1}$  glucose and  $1\text{ mg}$  467  
 $\text{mL}^{-1}$   $\text{K}_2\text{HPO}_4$ , and filtered through  $40\text{ }\mu\text{m}$  pore cell strainer. Spore concentration was adjusted 468  
to  $10^6$  spores  $\text{mL}^{-1}$  after quantification under a light microscope using a Neubauer chamber. 469  
Leaflets 10-15 days old tomato plants were excised and immediately placed in humid 470  
chambers. Leaflets were inoculated with one droplets of  $5\text{ }\mu\text{L}$  suspension. Twenty-four hours 471  
after inoculation, germinated conidia were imaged using a fluorescent Olympus IX 81 inverted 472  
laser scanning confocal microscope (Fluoview 500). Images were collected with a  $60\times$  1.0 NA 473  
PlanApo water-immersion lens in multi-track line mode. roGFP was excited at 405 nm in the 474  
first track and at 488 nm in the second track. For both excitation wavelengths, roGFP 475  
fluorescence was collected with a bandpass filter of 505–530 nm and averaged from four 476  
readings for noise reduction [50]. The Ratiometric analyses of fluorescence images were 477  
calculated using Fiji-ImageJ. 478

### **Data analysis**

 479

Data is presented as minimum to maximum values in boxplots or floating bar graphs, or as 480  
average  $\pm$ SEM in bar graphs. For Gaussian distributed samples, we analyzed the statistical 481  
significance of differences between two groups using a two-tailed t-test, with additional post 482  
hoc correction where appropriate, such as Welch's correction for t-tests between samples 483  
with unequal variances. We analyzed the statistical significance of differences among three 484  
or more groups using analysis of variance (ANOVA). Regular ANOVA was used for groups with 485

equal variances, and Welch's ANOVA for groups with unequal variances. Significance in 486  
differences between the means of different samples in a group of three or more samples was 487  
assessed using a post-hoc test. The Tukey post-hoc test was used for samples with equal 488  
variances, when the mean of each sample was compared to the mean of every other sample. 489  
The Bonferroni post-hoc test was used for samples with equal variances, when the mean of 490  
each sample was compared to the mean of a control sample. The Dunnett post-hoc test was 491  
used for samples with unequal variances. For samples with non-Gaussian distribution, we 492  
analyzed the statistical significance of differences between two groups using a Mann-Whitney 493  
U test, and the statistical significance of differences among three or more groups using 494  
Kruskal-Wallis ANOVA, with Dunn's multiple comparison post-hoc test as indicated. Gaussian 495  
distribution or lack thereof was determined using the Shapiro-Wilk test for normality. 496  
Statistical analyses were conducted using Prism8™. 497

## Acknowledgments 499

This work was supported by the Israel Science Foundation grant No. 1759/20 to MB. The 500  
lifeact and roGFP constructs were kindly provided by Julia Schumacher. GA is supported by 501  
the Indo-China ARO Postdoctoral Fellowship Program. MB thanks members of the Bar group 502  
for continuous discussion and support. 503

## Author contributions 504

Conceptualization: GA, MB. Design: GA, RG, MB. Methodology & experimentation: GA, RG. 505  
Analysis: GA, RG, MB. Manuscript: GA, MB. 506

**The authors declare no competing interest.** 507

## **Data availability statement**

508

The authors declare that the data supporting the findings of this study are available within 509  
the paper and its supplementary information files. Raw data is available from the 510  
corresponding author upon reasonable request. The raw data generated in the transcriptomic 511  
analyses is deposited in NCBI under Bioproject accession number PRJNA718329. 512

513



| <b>References</b> |                                                                                                                                                                                                                                                                                                                                                                        | 514                             |
|-------------------|------------------------------------------------------------------------------------------------------------------------------------------------------------------------------------------------------------------------------------------------------------------------------------------------------------------------------------------------------------------------|---------------------------------|
| 1.                | Wybouw B, de Rybel B. Cytokinin – A Developing Story. Trends in Plant Science. 2019. pp. 177–185. doi:10.1016/j.tplants.2018.10.012                                                                                                                                                                                                                                    | 515<br>516                      |
| 2.                | Cortleven A, Leuendorf JE, Frank M, Pezzetta D, Bolt S, Schmölling T. Cytokinin action in response to abiotic and biotic stresses in plants. Plant Cell and Environment. 2019. pp. 998–1018. doi:10.1111/pce.13494                                                                                                                                                     | 517<br>518<br>519               |
| 3.                | Akhtar SS, Mekureyaw MF, Pandey C, Roitsch T. Role of Cytokinins for Interactions of Plants With Microbial Pathogens and Pest Insects. Frontiers in Plant Science. 2020. p. 1777. doi:10.3389/fpls.2019.01777                                                                                                                                                          | 520<br>521<br>522               |
| 4.                | Gupta R, Pizarro L, Leibman-Markus M, Marash I, Bar M. Cytokinin response induces immunity and fungal pathogen resistance, and modulates trafficking of the PRR LeEIX2 in tomato. Molecular Plant Pathology. 2020;21: 1287–1306. doi:10.1111/mpp.12978                                                                                                                 | 523<br>524<br>525               |
| 5.                | Brenner WG, Romanov GA, Köllmer I, Bürkle L, Schmölling T. Immediate-early and delayed cytokinin response genes of Arabidopsis thaliana identified by genome-wide expression profiling reveal novel cytokinin-sensitive processes and suggest cytokinin action through transcriptional cascades. Plant Journal. 2005;44: 314–333. doi:10.1111/j.1365-313X.2005.02530.x | 526<br>527<br>528<br>529<br>530 |
| 6.                | Sakakibara H, Takei K, Hirose N. Interactions between nitrogen and cytokinin in the regulation of metabolism and development. Trends in Plant Science. 2006. pp. 440–448. doi:10.1016/j.tplants.2006.07.004                                                                                                                                                            | 531<br>532<br>533               |
| 7.                | Martín AC, del Pozo JC, Iglesias J, Rubio V, Solano R, de La Peña A, et al. Influence of cytokinins on the expression of phosphate starvation responsive genes in Arabidopsis. Plant Journal. 2000;24: 559–567. doi:10.1046/j.1365-313X.2000.00893.x                                                                                                                   | 534<br>535<br>536               |
| 8.                | Maruyama-Nakashita A, Nakamura Y, Yamaya T, Takahashi H. A novel regulatory pathway of sulfate uptake in Arabidopsis roots: Implication of CRE1/WOL/AHK4-mediated cytokinin-dependent regulation. Plant Journal. 2004;38: 779–789. doi:10.1111/j.1365-313X.2004.02079.x                                                                                                | 537<br>538<br>539<br>540        |
| 9.                | Walters DR, McRoberts N, Fitt BDL. Are green islands red herrings? Significance of green islands in plant interactions with pathogens and pests. Biological Reviews. 2008. pp. 79–102. doi:10.1111/j.1469-185X.2007.00033.x                                                                                                                                            | 541<br>542<br>543               |
| 10.               | Babosha A v. Regulation of resistance and susceptibility in wheat-powdery mildew pathosystem with exogenous cytokinins. Journal of Plant Physiology. 2009;166: 1892–1903. doi:10.1016/j.jplph.2009.05.014                                                                                                                                                              | 544<br>545<br>546               |
| 11.               | Sharma N, Rahman MH, Liang Y, Kav NNV. Cytokinin inhibits the growth of Leptosphaeria maculans and Alternaria brassicae. Canadian Journal of Plant Pathology. 2010;32: 306–314. doi:10.1080/07060661.2010.508612                                                                                                                                                       | 547<br>548<br>549               |

|     |                                                                                                                                                                                                                                                                                                                                      |                          |
|-----|--------------------------------------------------------------------------------------------------------------------------------------------------------------------------------------------------------------------------------------------------------------------------------------------------------------------------------------|--------------------------|
| 12. | Choi J, Huh SU, Kojima M, Sakakibara H, Paek KH, Hwang I. The cytokinin-activated transcription factor ARR2 promotes plant immunity via TGA3/NPR1-dependent salicylic acid signaling in arabidopsis. <i>Developmental Cell</i> . 2010;19: 284–295.<br>doi:10.1016/j.devcel.2010.07.011                                               | 550<br>551<br>552<br>553 |
| 13. | Jameson PE. Cytokinins and auxins in plant-pathogen interactions - An overview. <i>Plant Growth Regulation</i> . 2000. pp. 369–380. doi:10.1023/A:1010733617543                                                                                                                                                                      | 554<br>555               |
| 14. | Greene EM. Cytokinin production by microorganisms. <i>The Botanical Review</i> . 1980;46: 25–74.<br>doi:10.1007/BF02860866                                                                                                                                                                                                           | 556<br>557               |
| 15. | Angra R, Mandahar CL. Pathogenesis of barley leaves by <i>Helminthosporium teres</i> I: Green island formation and the possible involvement of cytokinins. <i>Mycopathologia</i> . 1991;114: 21–27. doi:10.1007/BF00436687                                                                                                           | 558<br>559<br>560        |
| 16. | Liu Z, Bushnell WR. Effects of cytokinins on fungus development and host response in powdery mildew of barley. <i>Physiological and Molecular Plant Pathology</i> . 1986;29: 41–52.<br>doi:10.1016/S0048-4059(86)80036-4                                                                                                             | 561<br>562<br>563        |
| 17. | Ashby AM. Biotrophy and the cytokinin conundrum. <i>Physiological and Molecular Plant Pathology</i> . 2000. pp. 147–158. doi:10.1006/pmpp.2000.0294                                                                                                                                                                                  | 564<br>565               |
| 18. | Milo GE, Srivastava BIS. Effect of cytokinins on tobacco mosaic virus production in local-lesion and systemic hosts. <i>Virology</i> . 1969;38: 26–31. doi:10.1016/0042-6822(69)90124-X                                                                                                                                              | 566<br>567               |
| 19. | Großkinsky DK, Naseem M, Abdelmohsen UR, Plickert N, Engelke T, Griebel T, et al. Cytokinins mediate resistance against <i>Pseudomonas syringae</i> in tobacco through increased antimicrobial phytoalexin synthesis independent of salicylic acid signaling. <i>Plant Physiology</i> . 2011;157: 815–830. doi:10.1104/pp.111.182931 | 568<br>569<br>570<br>571 |
| 20. | Ballaré CL. Jasmonate-induced defenses: A tale of intelligence, collaborators and rascals. <i>Trends in Plant Science</i> . 2011. pp. 249–257. doi:10.1016/j.tplants.2010.12.001                                                                                                                                                     | 572<br>573               |
| 21. | Gupta R, Leibman-Markus M, Pizarro L, Bar M. Cytokinin induces bacterial pathogen resistance in tomato. <i>Plant Pathology</i> . 2021;70: 318–325. doi:10.1111/ppa.13279                                                                                                                                                             | 574<br>575               |
| 22. | Fillinger S, Elad Y. Botrytis - The fungus, the pathogen and its management in agricultural systems. <i>Botrytis - The Fungus, the Pathogen and its Management in Agricultural Systems</i> . 2015. doi:10.1007/978-3-319-23371-0                                                                                                     | 576<br>577<br>578        |
| 23. | Veloso J, van Kan JAL. Many Shades of Grey in Botrytis–Host Plant Interactions. <i>Trends in Plant Science</i> . 2018. pp. 613–622. doi:10.1016/j.tplants.2018.03.016                                                                                                                                                                | 579<br>580               |
| 24. | Rajarammohan S. Redefining Plant-Necrotroph Interactions: The Thin Line Between Hemibiotrophs and Necrotrophs. <i>Frontiers in Microbiology</i> . 2021;12: 944.<br>doi:10.3389/fmicb.2021.673518                                                                                                                                     | 581<br>582<br>583        |

|     |                                                                                                                                                                                                                                                                                                                     |     |                   |
|-----|---------------------------------------------------------------------------------------------------------------------------------------------------------------------------------------------------------------------------------------------------------------------------------------------------------------------|-----|-------------------|
| 25. | Dean R, van Kan JAL, Pretorius ZA, Hammond-Kosack KE, di Pietro A, Spanu PD, et al. The Top 10 fungal pathogens in molecular plant pathology. <i>Molecular Plant Pathology</i> . 2012. pp. 414–430. doi:10.1111/j.1364-3703.2011.00783.x                                                                            | 584 | 585<br>586        |
| 26. | Colmenares AJ, Aleu J, Durán-Patrón R, Collado IG, Hernández-Galán R. The putative role of botrydial and related metabolites in the infection mechanism of <i>Botrytis cinerea</i> . <i>Journal of Chemical Ecology</i> . 2002;28: 997–1005. doi:10.1023/A:1015209817830                                            | 587 | 588<br>589        |
| 27. | Tani H, Koshino H, Sakuno E, Nakajima H. Botcinins A, B, C, and D, Metabolites Produced by <i>Botrytis cinerea</i> , and Their Antifungal Activity against <i>Magnaporthe oryzae</i> , a Pathogen of Rice Blast Disease. <i>Journal of Natural Products</i> . 2005;68. doi:10.1021/np0503855                        | 590 | 591<br>592        |
| 28. | Choquer M, Fournier E, Kunz C, Levis C, Pradier JM, Simon A, et al. <i>Botrytis cinerea</i> virulence factors: New insights into a necrotrophic and polyphageous pathogen. <i>FEMS Microbiology Letters</i> . 2007. pp. 1–10. doi:10.1111/j.1574-6968.2007.00930.x                                                  | 593 | 594<br>595        |
| 29. | Williamson B, Tudzynski B, Tudzynski P, van Kan JAL. <i>Botrytis cinerea</i> : The cause of grey mould disease. <i>Molecular Plant Pathology</i> . 2007. pp. 561–580. doi:10.1111/j.1364-3703.2007.00417.x                                                                                                          | 596 | 597<br>598        |
| 30. | van Kan JAL. Licensed to kill: the lifestyle of a necrotrophic plant pathogen. <i>Trends in Plant Science</i> . 2006. pp. 247–253. doi:10.1016/j.tplants.2006.03.005                                                                                                                                                | 599 | 600               |
| 31. | Schumacher J, Simon A, Cohrs KC, Viaud M, Tudzynski P. The Transcription Factor BcLTF1 Regulates Virulence and Light Responses in the Necrotrophic Plant Pathogen <i>Botrytis cinerea</i> . <i>PLoS Genetics</i> . 2014;10: e1004040. doi:10.1371/journal.pgen.1004040                                              | 601 | 602<br>603        |
| 32. | T. Kosuge, W.B. Hewitt. Exudates of grape berries and their effect on germination of conidia of <i>Botrytis cinerea</i> . <i>Phytopathology</i> . 1964;54: 167–172.                                                                                                                                                 | 604 | 605               |
| 33. | R.G. Orellana, C.A. Thomas. Nature of predisposition of castor beans to <i>Botrytis</i> . I. Relation of leachable sugar and certain other biochemical constituents of the capsule to varietal susceptibility. <i>Phytopathology</i> . 1962;52: 533–538.                                                            | 606 | 607<br>608        |
| 34. | Solomon PS, Tan KC, Oliver RP. The nutrient supply of pathogenic fungi; a fertile field for study. <i>Molecular Plant Pathology</i> . 2003. pp. 203–210. doi:10.1046/j.1364-3703.2003.00161.x                                                                                                                       | 609 | 610               |
| 35. | Kimura A, Takano Y, Furusawa I, Okuno T. Peroxisomal Metabolic Function Is Required for Appressorium-Mediated Plant Infection by <i>Colletotrichum lagenarium</i> . <i>The Plant Cell</i> . 2001;13: 1945–1957. doi:10.1105/tpc.010084                                                                              | 611 | 612<br>613        |
| 36. | Joosten MHAJ, Hendrickx LJM, de Wit PJGM. Carbohydrate composition of apoplastic fluids isolated from tomato leaves inoculated with virulent or avirulent races of <i>Cladosporium fulvum</i> (syn. <i>Fulvia fulva</i> ). <i>Netherlands Journal of Plant Pathology</i> . 1990;96: 103–112. doi:10.1007/BF02005134 | 614 | 615<br>616<br>617 |
| 37. | Bowyer P, Mueller E, Lucas J. Use of an isocitrate lyase promoter-GFP fusion to monitor carbon metabolism of the plant pathogen <i>Tapesia yellundae</i> during infection of wheat. <i>Molecular Plant Pathology</i> . 2000;1: 253–262. doi:10.1046/j.1364-3703.2000.00030.x                                        | 618 | 619<br>620        |

|     |                                                                                                                                                                                                                                                                                                                 |     |     |     |
|-----|-----------------------------------------------------------------------------------------------------------------------------------------------------------------------------------------------------------------------------------------------------------------------------------------------------------------|-----|-----|-----|
| 38. | Gupta R, Anand G, Pizarro L, Laor D, Kovetz N, Sela N, et al. Cytokinin inhibits fungal development and virulence by targeting the cytoskeleton and cellular trafficking. <i>bioRxiv</i> , <a href="https://doi.org/10.1101/20201104369215">https://doi.org/10.1101/20201104369215</a> . 2021.                  | 621 | 622 | 623 |
| 39. | Miller GL. Use of Dinitrosalicylic Acid Reagent for Determination of Reducing Sugar. <i>Analytical Chemistry</i> . 1959;31. doi:10.1021/ac60147a030                                                                                                                                                             | 624 |     | 625 |
| 40. | Schumacher J. Tools for Botrytis cinerea: New expression vectors make the gray mold fungus more accessible to cell biology approaches. <i>Fungal Genetics and Biology</i> . 2012;49: 483–497. doi:10.1016/j.fgb.2012.03.005                                                                                     | 626 | 627 | 628 |
| 41. | Levis C, Fortini D, Brygoo Y. Transformation of Botrytis cinerea with the nitrate reductase gene (niaD) shows a high frequency of homologous recombination. <i>Current Genetics</i> . 1997;32: 157–162. doi:10.1007/s002940050261                                                                               | 629 |     | 630 |
| 42. | Schindelin J, Arganda-Carreras I, Frise E, Kaynig V, Longair M, Pietzsch T, et al. Fiji: an open-source platform for biological-image analysis. <i>Nature Methods</i> . 2012;9: 676–682. doi:10.1038/nmeth.2019                                                                                                 | 632 | 633 | 634 |
| 43. | Love MI, Huber W, Anders S. Moderated estimation of fold change and dispersion for RNA-seq data with DESeq2. <i>Genome Biology</i> . 2014;15: 550. doi:10.1186/s13059-014-0550-8                                                                                                                                | 635 |     | 636 |
| 44. | Buchfink B, Xie C, Huson DH. Fast and sensitive protein alignment using DIAMOND. <i>Nature Methods</i> . 2014. pp. 59–60. doi:10.1038/nmeth.3176                                                                                                                                                                | 637 |     | 638 |
| 45. | Conesa A, Götz S, García-Gómez JM, Terol J, Talón M, Robles M. Blast2GO: A universal tool for annotation, visualization and analysis in functional genomics research. <i>Bioinformatics</i> . 2005;21: 3674–3676. doi:10.1093/bioinformatics/bti610                                                             | 639 | 640 | 641 |
| 46. | Xie C, Mao X, Huang J, Ding Y, Wu J, Dong S, et al. KOBAS 2.0: A web server for annotation and identification of enriched pathways and diseases. <i>Nucleic Acids Research</i> . 2011;39: 316–322. doi:10.1093/nar/gkr483                                                                                       | 642 | 643 | 644 |
| 47. | Silva-Moreno E, Brito-Echeverría J, López M, Ríos J, Balic I, Campos-Vargas R, et al. Effect of cuticular waxes compounds from table grapes on growth, germination and gene expression in Botrytis cinerea. <i>World Journal of Microbiology and Biotechnology</i> . 2016;32: 74. doi:10.1007/s11274-016-2041-4 | 645 | 646 | 647 |
| 48. | Llanos A, François JM, Parrou JL. Tracking the best reference genes for RT-qPCR data normalization in filamentous fungi. <i>BMC Genomics</i> . 2015;16: 71. doi:10.1186/s12864-015-1224-y                                                                                                                       | 649 | 650 | 651 |
| 49. | D’haene B, Vandesompele J, Hellemans J. Accurate and objective copy number profiling using real-time quantitative PCR. <i>Methods</i> . 2010. pp. 262–270. doi:10.1016/j.ymeth.2009.12.007                                                                                                                      | 652 |     | 653 |
| 50. | Heller J, Meyer AJ, Tudzynski P. Redox-sensitive GFP2: Use of the genetically encoded biosensor of the redox status in the filamentous fungus Botrytis cinerea. <i>Molecular Plant Pathology</i> . 2012;13: 935–947. doi:10.1111/j.1364-3703.2012.00802.x                                                       | 654 | 655 | 656 |

|     |                                                                                                                                                                                                                                                                                                                                   |                          |
|-----|-----------------------------------------------------------------------------------------------------------------------------------------------------------------------------------------------------------------------------------------------------------------------------------------------------------------------------------|--------------------------|
| 51. | Marschall R, Schumacher J, Siegmund U, Tudzynski P. Chasing stress signals - Exposure to extracellular stimuli differentially affects the redox state of cell compartments in the wild type and signaling mutants of <i>Botrytis cinerea</i> . <i>Fungal Genetics and Biology</i> . 2016;90: 12–22. doi:10.1016/j.fgb.2016.03.002 | 657<br>658<br>659<br>660 |
| 52. | Berepiki A, Lichius A, Read ND. Actin organization and dynamics in filamentous fungi. <i>Nature Reviews Microbiology</i> . 2011. pp. 876–887. doi:10.1038/nrmicro2666                                                                                                                                                             | 661<br>662               |
| 53. | Walker SK, Garrill A. Actin microfilaments in fungi. <i>Mycologist</i> . 2006;20: 26–31. doi:10.1016/j.mycol.2005.11.001                                                                                                                                                                                                          | 663<br>664               |
| 54. | ten Have A, Mulder W, Visser J, van Kan JAL. The endopolygalacturonase gene <i>Bcpg1</i> is required to full virulence of <i>Botrytis cinerea</i> . <i>Molecular Plant-Microbe Interactions</i> . 1998;11: 1009–1016. doi:10.1094/mpmi.1998.11.10.1009                                                                            | 665<br>666<br>667        |
| 55. | Dulermo T, Rasclé C, Chinnici G, Gout E, Bligny R, Cotton P. Dynamic carbon transfer during pathogenesis of sunflower by the necrotrophic fungus <i>Botrytis cinerea</i> : From plant hexoses to mannitol. <i>New Phytologist</i> . 2009;183: 1149–1162. doi:10.1111/j.1469-8137.2009.02890.x                                     | 668<br>669<br>670        |
| 56. | Rui O, Hahn M. The <i>Botrytis cinerea</i> hexokinase, <i>Hxk1</i> , but not the glucokinase, <i>Glk1</i> , is required for normal growth and sugar metabolism, and for pathogenicity on fruits. <i>Microbiology</i> . 2007;153: 2791–2802. doi:10.1099/mic.0.2007/006338-0                                                       | 671<br>672<br>673        |
| 57. | Pajak B, Siwiak E, Sołtyka M, Priebe A, Zieliński R, Fokt I, et al. 2-Deoxy-D-Glucose and its analogs: From diagnostic to therapeutic agents. <i>International Journal of Molecular Sciences</i> . 2020. p. 234. doi:10.3390/ijms21010234                                                                                         | 674<br>675<br>676        |
| 58. | Shchepina LA, Pletjushkina OY, Avetisyan A v, Bakeeva LE, Fetisova EK, Izyumov DS, et al. Oligomycin, inhibitor of the F <sub>0</sub> part of H <sup>+</sup> -ATP-synthase, suppresses the TNF-induced apoptosis. <i>Oncogene</i> . 2002;21. doi:10.1038/sj.onc.1206053                                                           | 677<br>678<br>679        |
| 59. | SMITH RM, PETERSON WH, McCOY E. Oligomycin, a new antifungal antibiotic. <i>Antibiotics &amp; chemotherapy</i> . 1954;4: 962–970.                                                                                                                                                                                                 | 680<br>681               |
| 60. | Ralser M, Wamelink MM, Kowald A, Gerisch B, Heeren G, Struys EA, et al. Dynamic rerouting of the carbohydrate flux is key to counteracting oxidative stress. <i>Journal of Biology</i> . 2007;6: 10. doi:10.1186/jbiol61                                                                                                          | 682<br>683<br>684        |
| 61. | Li H, Tian S, Qin G. NADPH oxidase is crucial for the cellular redox homeostasis in fungal pathogen <i>botrytis cinerea</i> . <i>Molecular Plant-Microbe Interactions</i> . 2019;32: 1508–1516. doi:10.1094/MPMI-05-19-0124-R                                                                                                     | 685<br>686<br>687        |
| 62. | Viefhues A, Heller J, Temme N, Tudzynski P. Redox systems in <i>Botrytis cinerea</i> : Impact on development and virulence. <i>Molecular Plant-Microbe Interactions</i> . 2014;27: 858–874. doi:10.1094/MPMI-01-14-0012-R                                                                                                         | 688<br>689<br>690        |
| 63. | González-Rodríguez VE, Garrido C, Cantoral JM, Schumacher J. The F-actin capping protein is required for hyphal growth and full virulence but is dispensable for septum formation in <i>Botrytis cinerea</i> . <i>Fungal Biology</i> . 2016;120: 1225–1235. doi:10.1016/j.funbio.2016.07.007                                      | 691<br>692<br>693        |

64. Li H, Zhang Z, He C, Qin G, Tian S. Comparative proteomics reveals the potential targets of BcNoxR, a putative regulatory subunit of NADPH oxidase of botrytis cinerea. *Molecular Plant-Microbe Interactions*. 2016;29: 990–1003. doi:10.1094/MPMI-11-16-0227-R 694 695 696
65. Muller FL, Liu Y, van Remmen H. Complex III releases superoxide to both sides of the inner mitochondrial membrane. *Journal of Biological Chemistry*. 2004;279: 49064–49073. doi:10.1074/jbc.M407715200 697 698 699
66. Coghlan SE, Walters DR. Photosynthesis in green-islands on powdery mildewinfected barley leaves. *Physiological and Molecular Plant Pathology*. 1992;40: 31–38. doi:10.1016/0885-5765(92)90069-8 700 701 702
67. Angra-Sharma R, Sharma DK. Cytokinins in pathogenesis and disease resistance of *Pyrenophora teres*-barley and *Drechslera maydis*-maize interactions during early stages of infection. *Mycopathologia*. 2000;148: 87–95. doi:10.1023/A:1007126025955 703 704 705
68. Prins TW, Tudzynski P, von Tiedemann A, Tudzynski B, ten Have A, Hansen ME, et al. Infection Strategies of *Botrytis cinerea* and Related Necrotrophic Pathogens. *Fungal Pathology*. 2000. pp. 33–64. doi:10.1007/978-94-015-9546-9\_2 706 707 708

709

710

## Supplementary information 711

**S1 Fig.** CK-mediated growth inhibition depends on nutrient availability- Dry weight measured 712

from fungi grown in liquid media. 713

**S2 Fig.** Plant endogenous CK alters *Bc* cytosolic redox state during infection- additional 714

genotypes. 715

**S3 Fig.** Plant endogenous CK alters *Bc* redox state during infection- plate assay. 716

**S4 Fig.** *Bc* transformed roGFP lines display virulence behaviour similar to that of the 717

background line. 718

**S5 Fig.** CK alters *Bc* redox state- changes in the transcriptome. 719

**S1 Table.** Oligonucleotides used for generating and validating *Botrytis cinerea* transgenic 720

strains. 721

**S2 Table.** Primers used in RT-qPCR. 722

**S1 Data.** Transcriptomic effect of CK on *Bc* metabolic pathways. 723

724

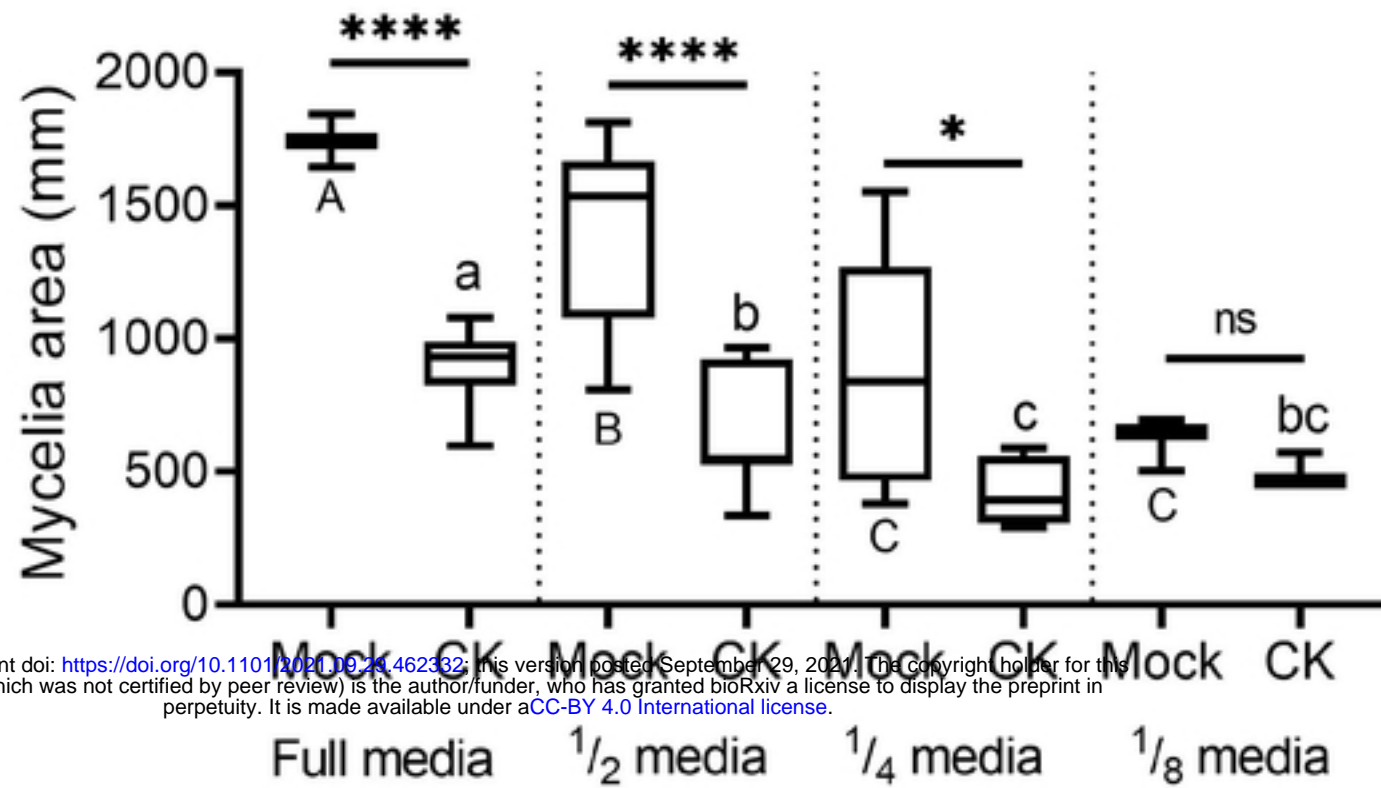

**Fig. 1 CK-mediated growth inhibition depends on nutrient availability**

*Bc* mycelia were grown on PDA plates without (Mock) or with the addition of the CK 6-BAP (6-Benzylaminopurine, 100  $\mu$ M) and incubated at  $22 \pm 2$  °C in the dark. Mycelial area was measured after 5 days. Boxplots are shown with minimum to maximum values, inner quartile ranges (box), median (line in box), and outer quartile ranges (whiskers), N=6. Results were analyzed for statistical significance using a one-way ANOVA with a Bonferroni post-hoc test, or a two-tailed t-test with Welch's correction. Asterisks indicate statistically significant differences between the Mock and CK samples within the same media, \*\*\*\* $p < 0.0001$ ; \* $p < 0.05$ ; ns=non-significant. Upper case letters indicate statistically significant differences in the growth of Mock samples in different media,  $p < 0.0035$ ; lower case letters indicate statistically significant differences in the growth of CK-treated samples in different media,  $p < 0.05$ .



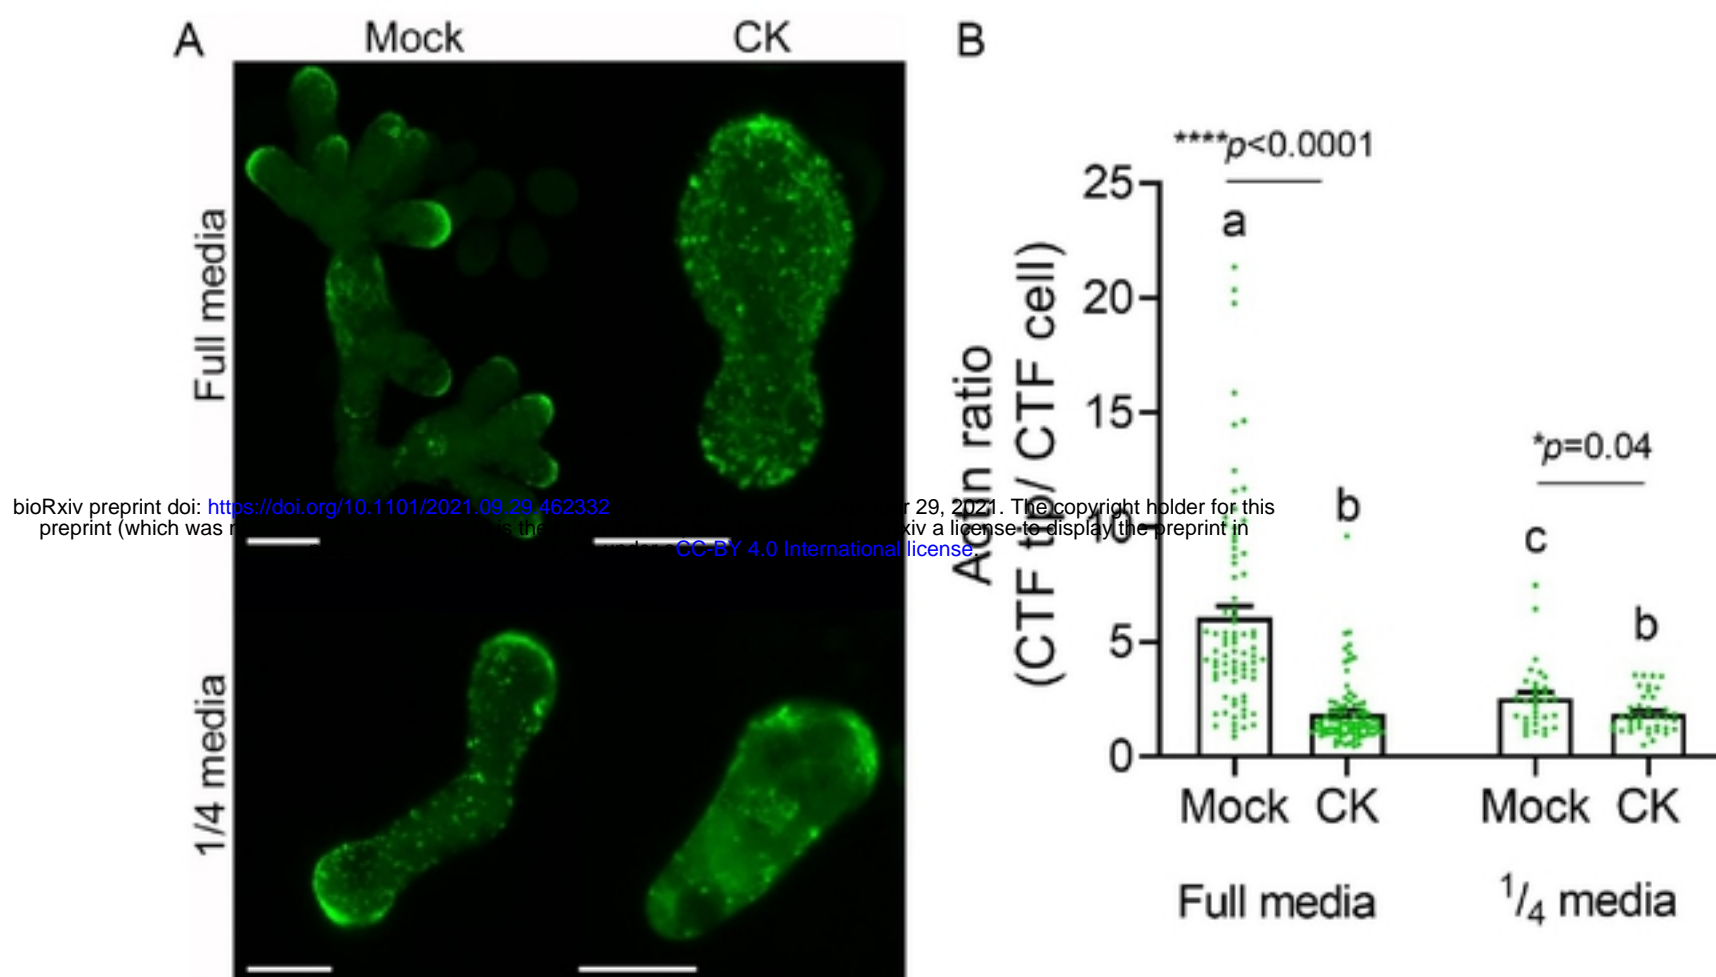

**Fig. 2 CK-mediated cytoskeleton inhibition depends on nutrient availability**

Spores of *B. cinerea* expressing the filamentous actin marker lifeact-GFP, were treated with Mock or CK, and grown for 6 h and 24h hours prior to confocal visualization, in full and one fourth potato dextrose broth media, respectively. **(A)** Representative images, bar=10  $\mu$ M. **(B)** Analysis of corrected total fluorescence (CTF) of the ratio between actin at the tip of the cell and the total cell in Mock and CK treated cells. Three independent experiments were conducted with a minimum of 24 images analyzed,  $N > 32$  growing hypha tips. Bars are shown  $\pm$ SEM, with all points. Letters and Asterisks indicate significance in Kruskal-Wallis ANOVA with Dunn's post hoc test, \* $p < 0.05$  and \*\*\*\* $p < 0.0001$ .

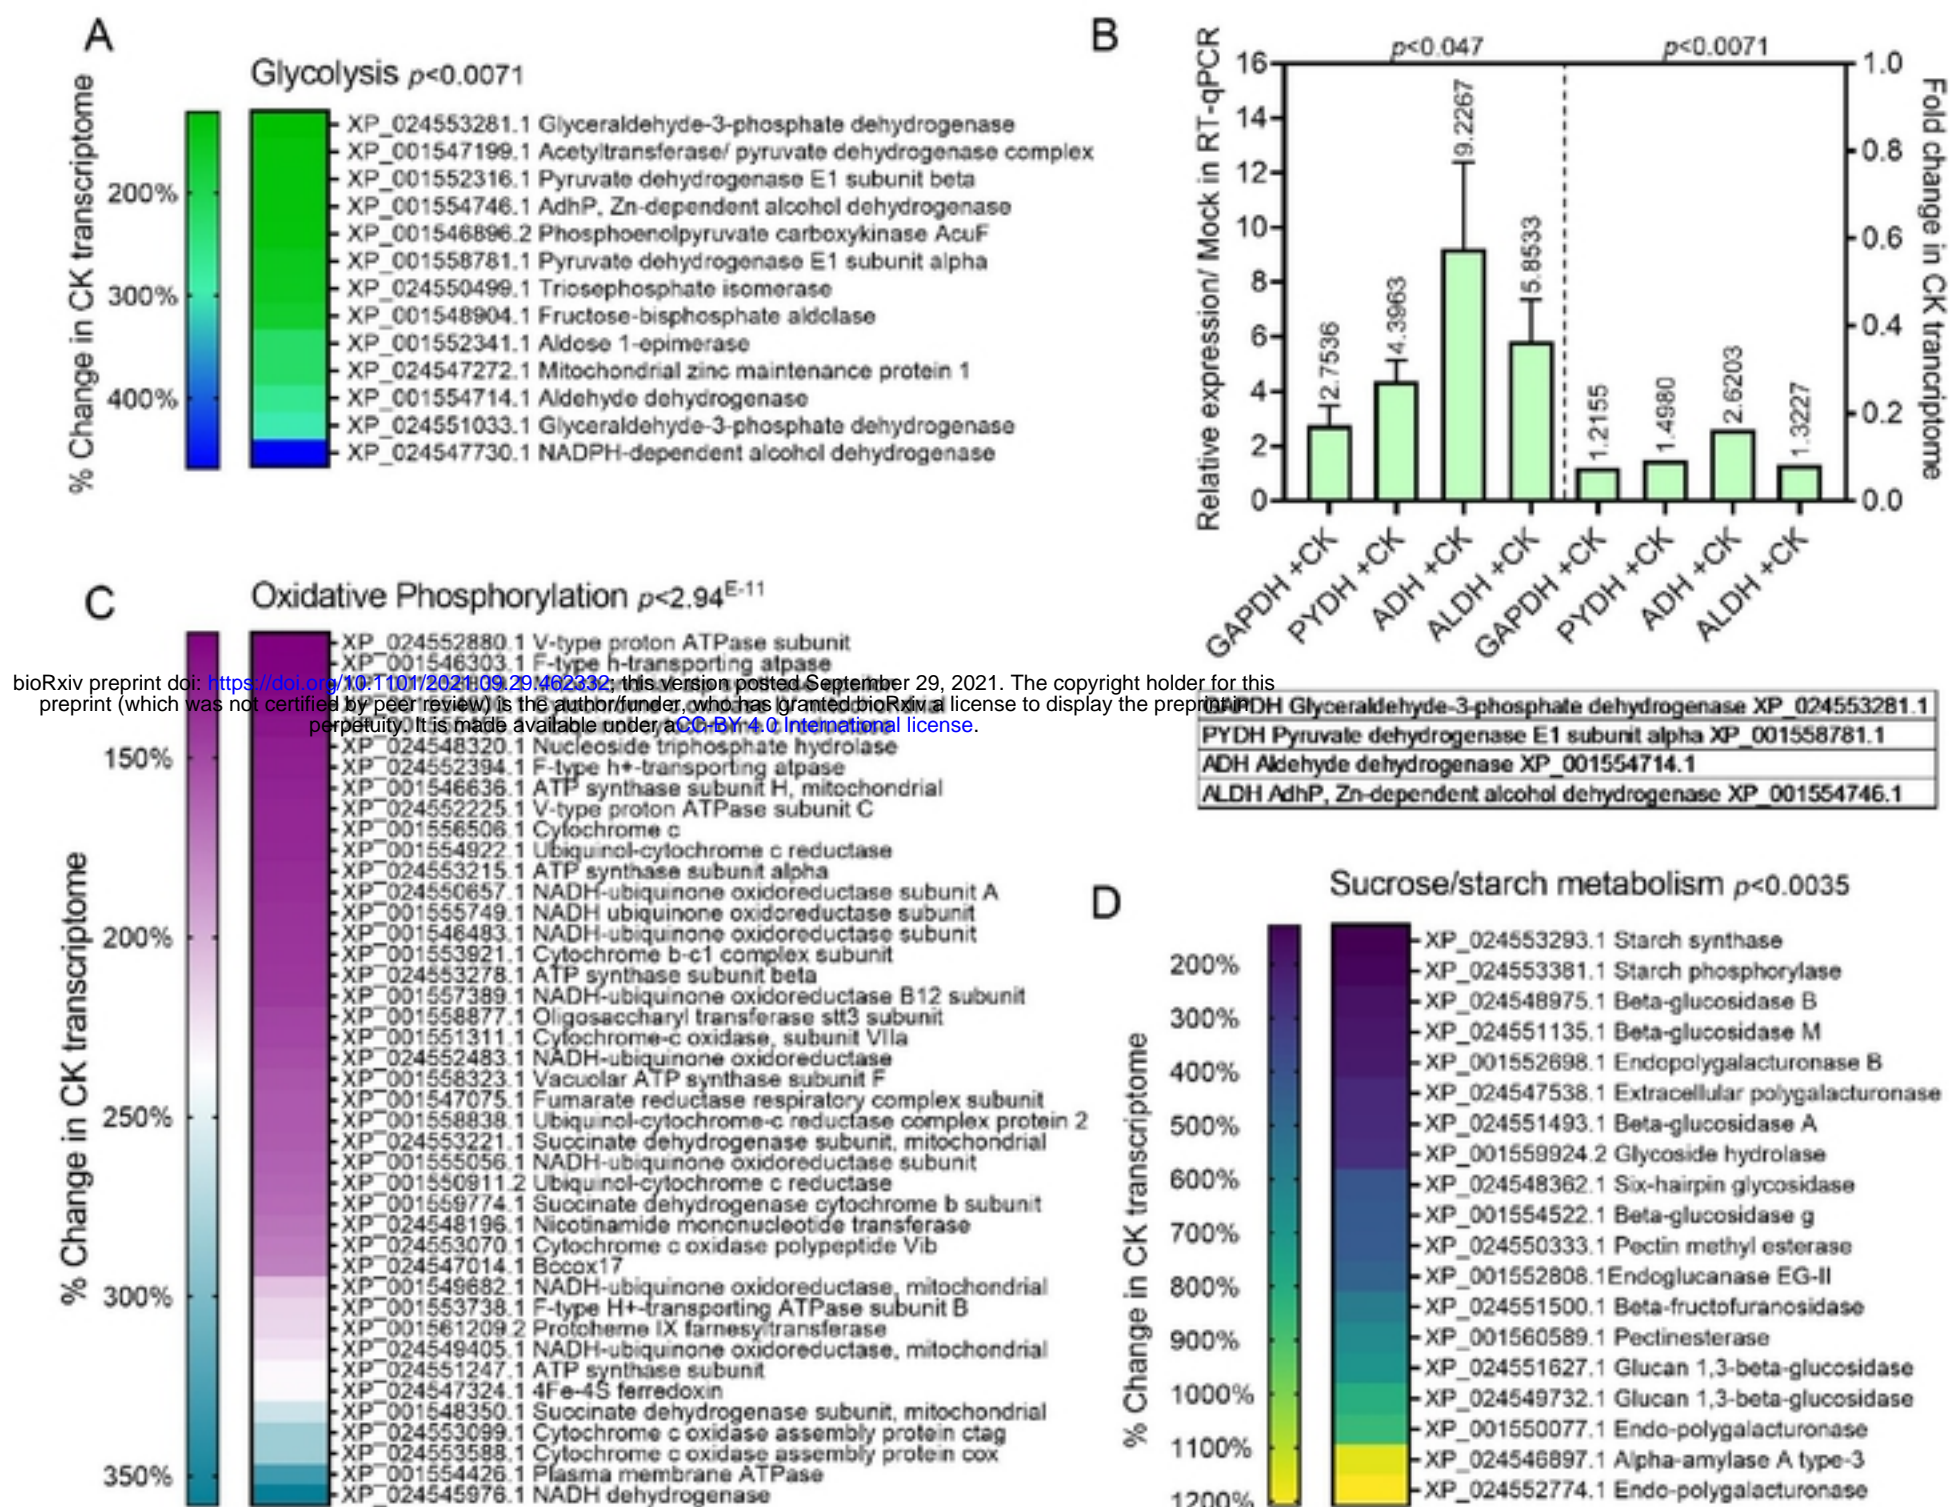

bioRxiv preprint doi: <https://doi.org/10.1101/202109.29.462332>; this version posted September 29, 2021. The copyright holder for this preprint (which was not certified by peer review) is the author/funder, who has granted bioRxiv a license to display the preprint in perpetuity. It is made available under aCC-BY 4.0 International license.

**Fig. 3** Transcriptomic analysis of botrytis grown with CK reveals up-regulation of energy metabolism pathways.

Illumina HiSeq NGS was conducted on *Bc* Mock treated or CK treated samples, 3 biological repeats each. Gene expression values were computed as FPKM, and differential expression analysis was completed using the DESeq2 R package. Genes with an adjusted  $p$ -value of no more than 0.05 and  $\log_2FC$  (Fold Change) greater than 1 or lesser than -1 were considered differentially expressed. The KOBAS 3.0 tool was used to detect the statistical enrichment of differential expression genes in Kyoto Encyclopedia of Genes and Genomes (KEGG) pathways and Gene Ontology (GO). Pathways were tested for significant enrichment using Fisher's exact test, with Benjamini and Hochberg FDR correction. Corrected  $p$ -value was deemed significant at  $p < 0.05$ . The Glycolysis (**A-B**), Oxidative phosphorylation (**C**) and Sucrose metabolism (**D**) pathways were all found to be significantly up-regulated upon CK treatment. See also Supplemental data 1. **A,C,D** Heatmap representation of upregulated genes in the CK transcriptome in each indicated pathway. **B** Comparison of RT-qPCR validation of the 4 indicated key glycolysis genes with the transcriptomic values. The full transcriptome data was previously published (Gupta et al., 2021) and is available (NCBI bioproject PRJNA718329).

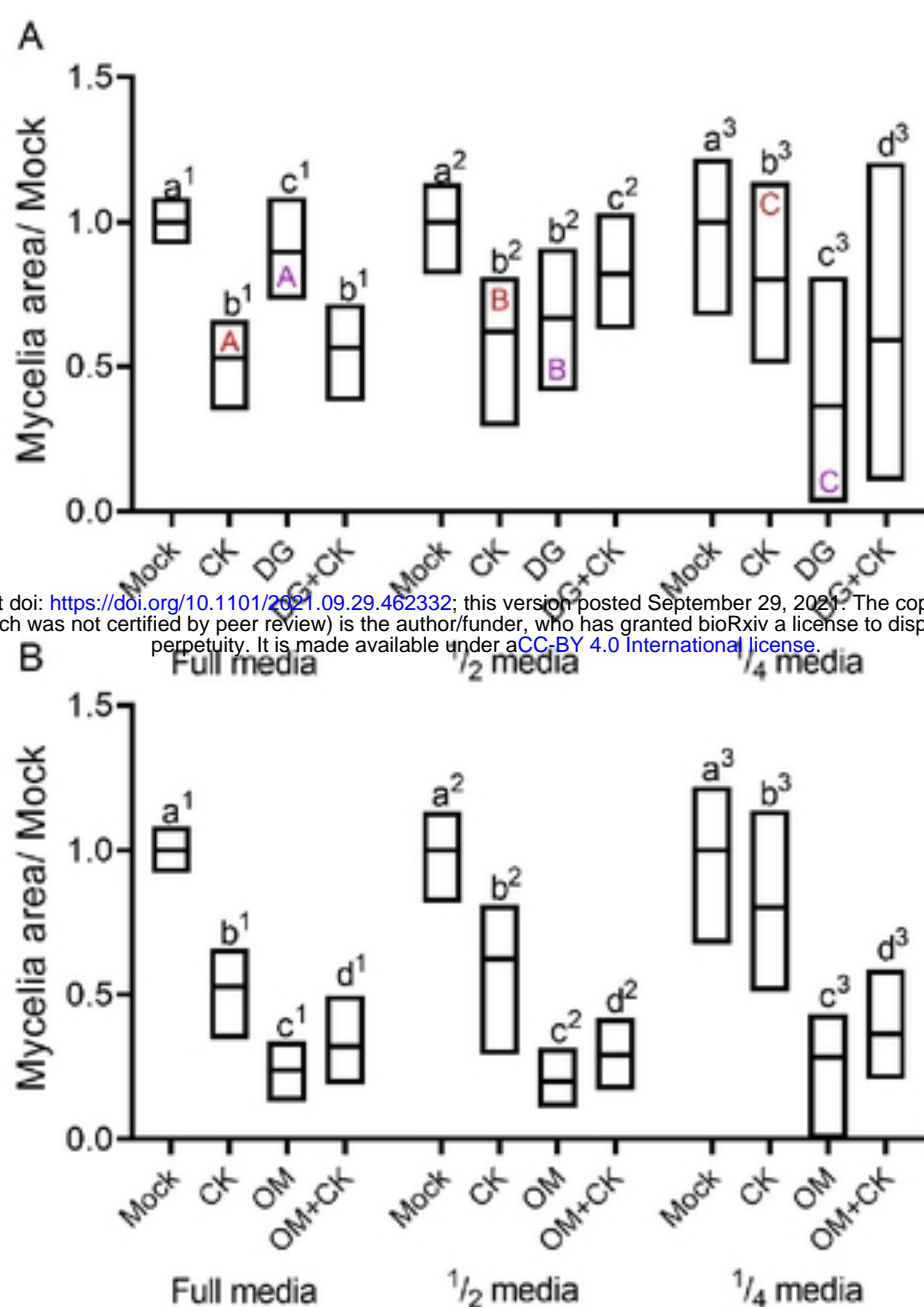

**Fig. 4 CK rescues glycolysis inhibition and partially rescues ATP synthesis inhibition**

*Bc* mycelia were grown on PDA plates without (Mock) or with the addition of the CK 6-BAP (6-Benzylaminopurine, 100  $\mu$ M), the competitive glucose inhibitor 2-DG (2-deoxyglucose, 2.5 mM) (A), or the ATP synthesis inhibitor OM (oligomycin, 1  $\mu$ M) (B) and incubated at  $22 \pm 2$  °C in the dark. Mycelia area was measured after 5 days. Floating bars are shown with minimum maximum values, line in bar indicates median.  $\pm$ SEM, N=10.

**A:** 2-deoxyglucose (DG). Results were analyzed for statistical significance using a one-way ANOVA with a Tukey post-hoc test. Lower case letters indicate statistically significant differences between samples, with number tags indicating the group that was comparatively analyzed,  $p < 0.025$ . Upper case letters within the top of CK bars indicate statistically significant differences in the level off CK-mediated growth inhibition,  $p < 0.018$ . Upper case letters within the bottom of DG bars indicate statistically significant differences in the level off DG-mediated growth inhibition,  $p < 0.011$ .

**B:** Oligomycin (OM). Results were analyzed for statistical significance using a one-way ANOVA with a Tukey post-hoc test, or a two-tailed t-test with Welch's correction. Letters indicate statistically significant differences between samples, with tags indicating the group that was comparatively analyzed,  $p < 0.038$ .

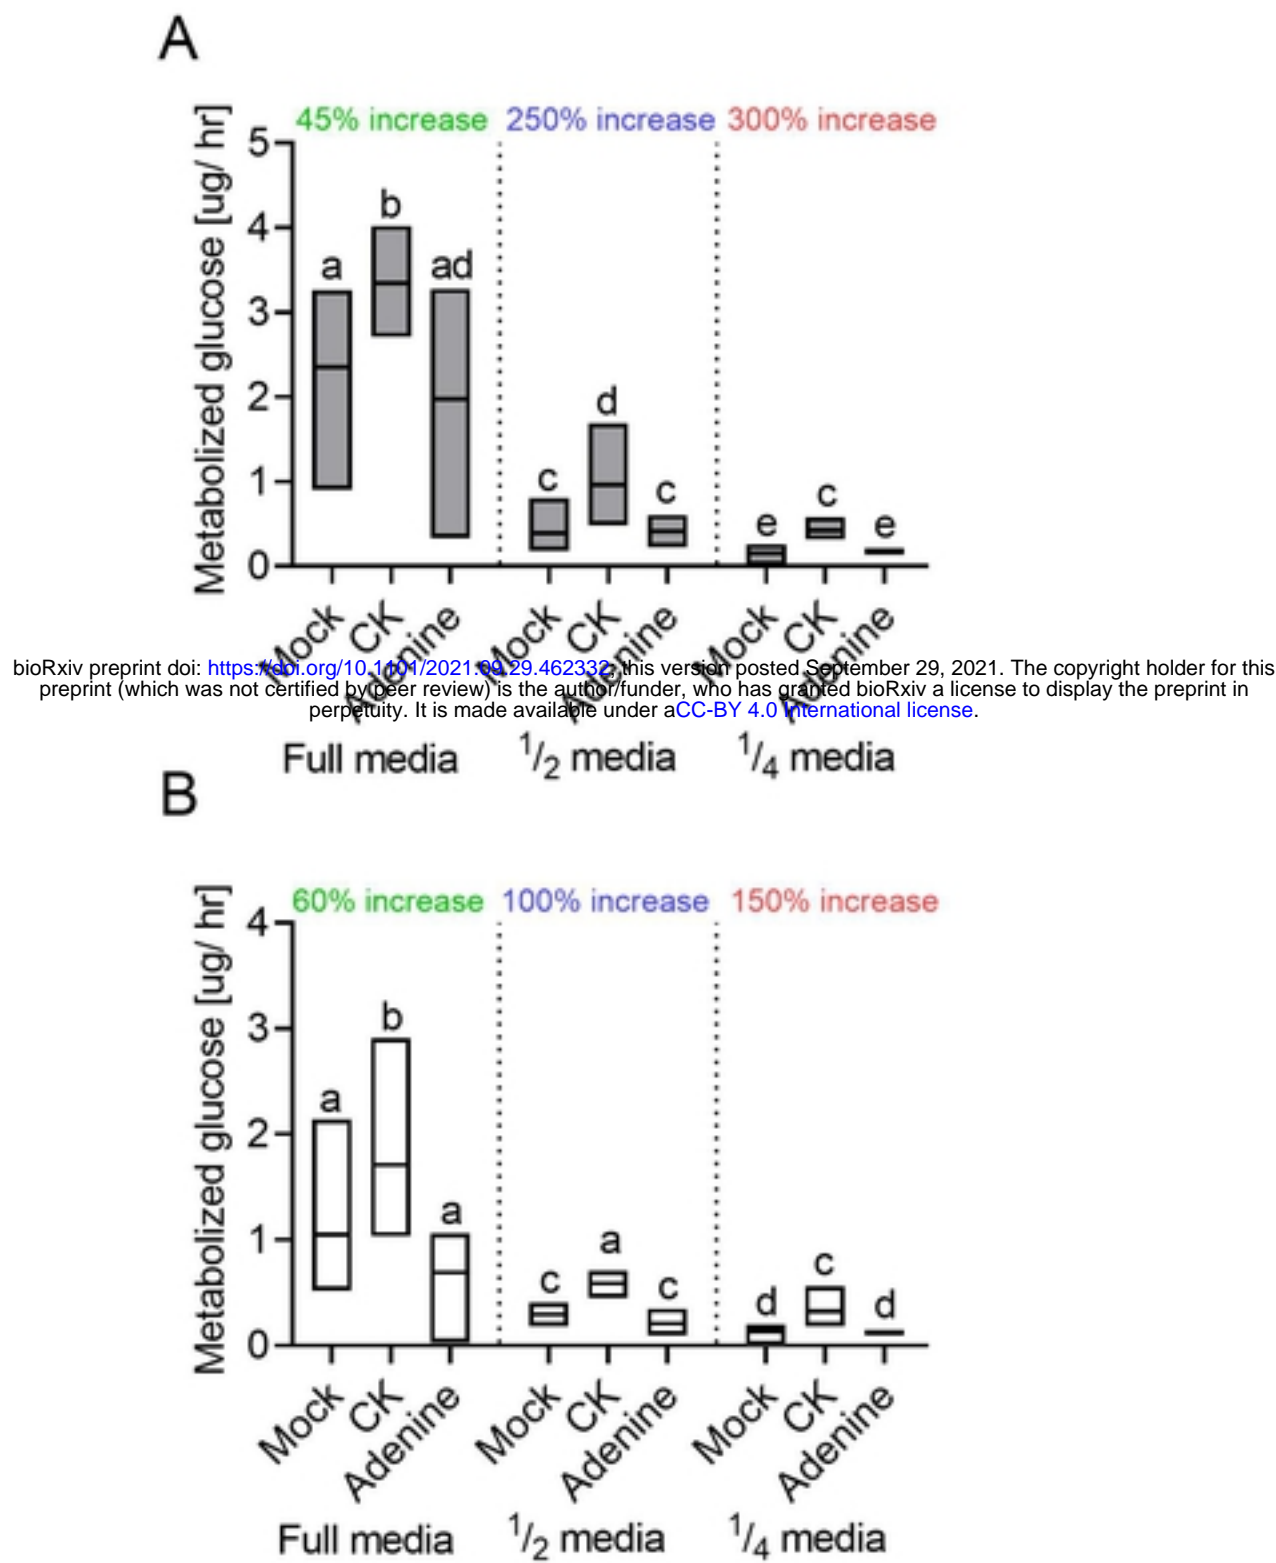

**Fig. 5 CK promotes glucose uptake.**

*Bc* spores ( $10^6$ / mL dissolved in sterile water) were grown in PDB (**A**) or Synthetic medium (**B**) with 150 rpm shaking, at  $22 \pm 2$  °C in the dark, without (Mock) or with the addition of the CK 6-BAP (6-Benzylaminopurine, 100  $\mu$ M), or the structural control Adenine, 100  $\mu$ M. The amount of glucose in the media was examined after 48 h, and subtracted from the amount of glucose present in media without fungi that underwent similar treatment. The approximate percent of increase in glucose uptake in the presence of CK is indicated above the bars for each media concentration. Floating bars are shown with minimum maximum values, line in bar indicates median. N=6. Results were analyzed for statistical significance using two-tailed t-test with Welch's correction. Letters indicate statistically significant differences between samples, **A**  $p < 0.04$ , **B**  $p < 0.049$ .

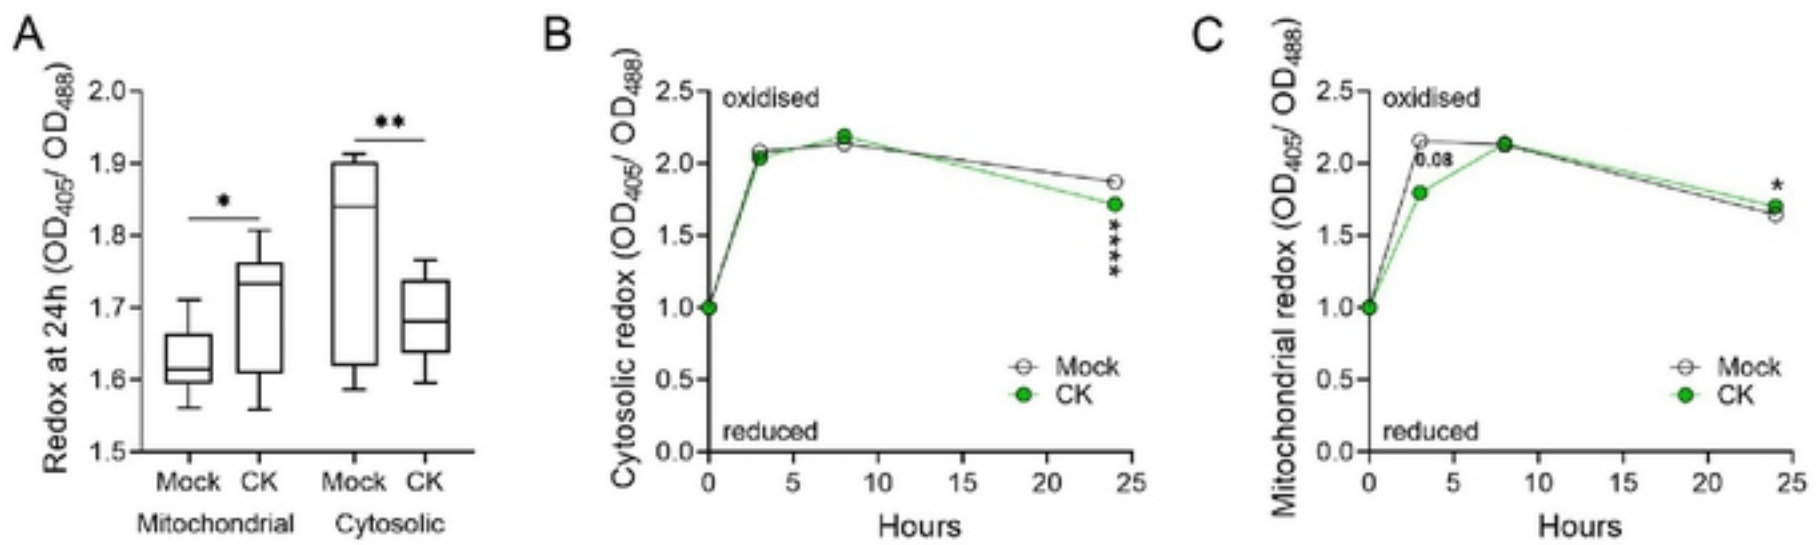

bioRxiv preprint doi: <https://doi.org/10.1101/2021.09.29.462332>; this version posted September 29, 2021. The copyright holder for this preprint (which was not certified by peer review) is the author/funder, who has granted bioRxiv a license to display the preprint in perpetuity. It is made available under aCC-BY 4.0 International license.

### Fig. 6 CK alters *Bc* redox state in rich media

The redox state of *Bc* without (Mock), or in the presence of CK, was assessed using roGFP transformed *Bc*. Spores ( $10^6$ / mL) of *Bc* strains expressing GRX-roGFP, for assessing cytosolic redox, and mito-roGFP, for assessing mitochondrial redox, were incubated in PDB without (Mock) or with CK 6-BAP (6-Benzylaminopurine, 100  $\mu$ M), for 24 h at 18°C, with 150 rpm shaking. Fluorescence was measured using a fluorimeter, with excitation at  $405 \pm 5$  nm for the oxidized state and  $488 \pm 5$  nm for the reduced state of roGFP2. The emission was detected at  $510 \pm 5$  nm. The redox ratio of the fungus was calculated as  $Em_{405}/Em_{488}$  of Relative fluorescence units (RFU). **(A)** Redox status of the mitochondria and cytosol, with and without CK, after 24 h. Boxplots are shown with minimum to maximum values, inner quartile ranges (box), median (line in box), and outer quartile ranges (whiskers),  $N=6$ . **(B)** Time course of redox state in the cytosol. **(C)** Time course of redox state in the mitochondria. Asterisks indicate statistical significance in a two-tailed t-test,  $*p<0.05$ ,  $**p<0.01$ ,  $****p<0.0001$ .

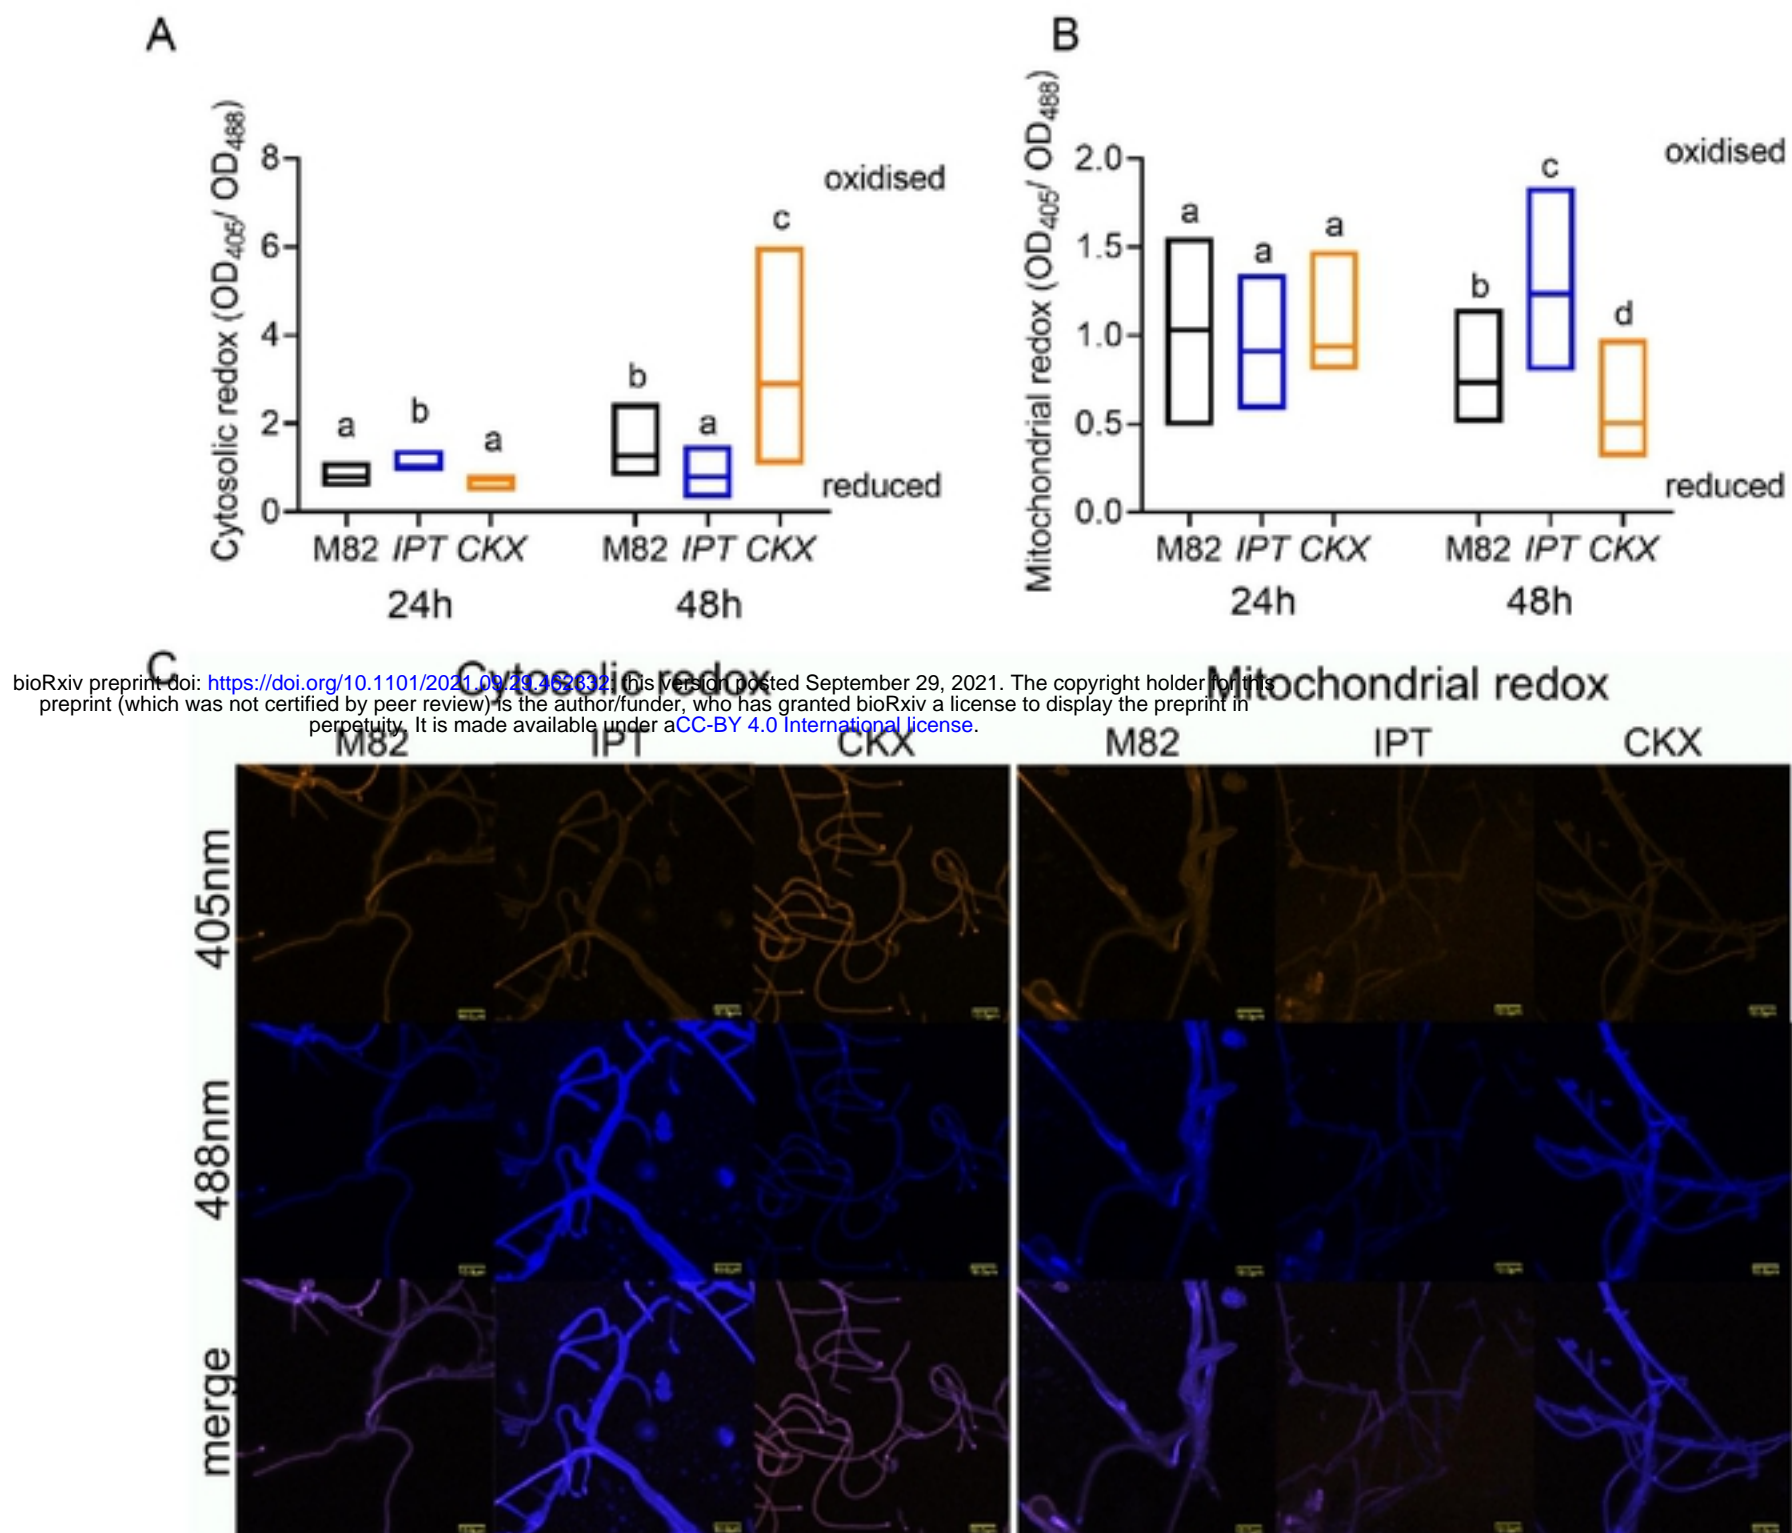

**Fig. 7 Plant endogenous CK alters *Bc* redox state during infection**

The redox state of *Bc* when infecting leaves of different CK-content tomato genotypes was assessed using roGFP transformed *Bc*. Spores ( $10^6/\text{mL}$  in glucose and  $\text{K}_2\text{HPO}_4$ ) of *Bc* strains expressing GRX-roGFP, for assessing cytosolic redox, and mito-roGFP, for assessing mitochondrial redox, were used to infect the background M82 wild-type line, the high-CK *pBLS>>IPT7* overexpressing line ("IPT"), and the low-CK *pFIL>>CKX3* overexpressing line ("CKX"). *Bc* fluorescence was captured using a confocal laser scanning microscope at 24 h and 48 h, with excitation at 405 nm for the oxidized state and 488 nm for the reduced state of roGFP2. The emission was detected using a 505-530 nm bandpass filter. The redox ratio of the fungus was calculated as  $Em_{405}/Em_{488}$  using ImageJ, from at least 12 images per time point, per treatment. (A) Redox status of the *Bc* cytosol, after 24 h and 48 h. (B) Redox status of the *Bc* mitochondria, after 24 h and 48 h. (A-B) Floating bars are shown with minimum to maximum values, lines indicates median,  $N=12$ . Differences between samples were assessed using a one-way ANOVA with a Dunnett post hoc test. Different letters indicate statistically significant differences between samples, (A)  $p<0.021$ , (B)  $p<0.029$ . (C) Representative images of the roGFP fungi growing on leaves of the different genotypes, captured at the "reduced" and "oxidized" wavelengths.
